# Supplementary material for: Tissue Damage in Radiation-Induced Oral Mucositis Is Mitigated by IL-17 Receptor Signaling
Source: Front Immunol. 2021 Jun 17;12:687627. doi: 10.3389/fimmu.2021.687627 (PMC8248500; doi:10.3389/fimmu.2021.687627)
Supplement: Supplementary file 2 [file Table_1.xlsx]

## Sheet: merge_deseq
Supplementary Table 1. Differentially expressed genes following radiation of the distal region of the tongue.
Values Represent log (base2) fold change of irradiated/sham treated control.
Gene ID	logFC	FDR	Gene Symbol	Annotation Notes
ENSMUSG00000040026	10	4.17058e-100	Saa3	serum amyloid A 3 [Source:MGI Symbol;Acc:MGI:98223]
ENSMUSG00000070335	-7.649	2.22353e-74	Krtap9-1	keratin associated protein 9-1 [Source:MGI Symbol;Acc:MGI:1309997]
ENSMUSG00000090225	-7.57097	9.0843e-68	Gm11559	predicted gene 11559 [Source:MGI Symbol;Acc:MGI:3652067]
ENSMUSG00000056071	7.38476	3.56949e-66	S100a9	S100 calcium binding protein A9 (calgranulin B) [Source:MGI Symbol;Acc:MGI:1338947]
ENSMUSG00000044649	-7.06499	3.14414e-65	Krtap4-2	keratin associated protein 4-2 [Source:MGI Symbol;Acc:MGI:1915923]
ENSMUSG00000059845	-6.69233	1.68508e-64	Gm11567	predicted gene 11567 [Source:MGI Symbol;Acc:MGI:3649436]
ENSMUSG00000067147	10.5236	1.68508e-64	Rpl7a-ps11	ribosomal protein L7A, pseudogene 11 [Source:MGI Symbol;Acc:MGI:3644020]
ENSMUSG00000056054	7.73256	2.40265e-64	S100a8	S100 calcium binding protein A8 (calgranulin A) [Source:MGI Symbol;Acc:MGI:88244]
ENSMUSG00000069718	-6.4916	8.65147e-63	Gm11563	predicted gene 11563 [Source:MGI Symbol;Acc:MGI:3650330]
ENSMUSG00000079012	8.53072	1.56292e-62	Serpina3m	serine (or cysteine) peptidase inhibitor, clade A, member 3M [Source:MGI Symbol;Acc:MGI:98378]
ENSMUSG00000046474	-6.13978	1.80039e-61	Krtap4-16	keratin associated protein 4-16 [Source:MGI Symbol;Acc:MGI:3651030]
ENSMUSG00000045109	-6.00092	1.30447e-60	Krtap4-7	keratin associated protein 4-7 [Source:MGI Symbol;Acc:MGI:1923694]
ENSMUSG00000063251	-5.75855	6.82523e-60	Krtap4-1	keratin associated protein 4-1 [Source:MGI Symbol;Acc:MGI:3622079]
ENSMUSG00000069717	-6.2258	7.55363e-60	Gm11568	predicted gene 11568 [Source:MGI Symbol;Acc:MGI:3650331]
ENSMUSG00000078261	-6.87645	1.88587e-58	Gm11596	predicted gene 11596 [Source:MGI Symbol;Acc:MGI:3652177]
ENSMUSG00000078668	-6.26061	6.06636e-58	Gm11595	predicted gene 11595 [Source:MGI Symbol;Acc:MGI:3652308]
ENSMUSG00000078262	-6.18638	3.81117e-55	Krtap4-9	keratin associated protein 4-9 [Source:MGI Symbol;Acc:MGI:3652060]
ENSMUSG00000043613	6.2897	9.91176e-55	Mmp3	matrix metallopeptidase 3 [Source:MGI Symbol;Acc:MGI:97010]
ENSMUSG00000035592	-5.44483	1.04823e-53	Krt33a	keratin 33A [Source:MGI Symbol;Acc:MGI:1919138]
ENSMUSG00000089724	-5.59204	1.12817e-50	Krtap4-8	keratin associated protein 4-8 [Source:MGI Symbol;Acc:MGI:3652306]
ENSMUSG00000021091	7.28864	5.87007e-50	Serpina3n	serine (or cysteine) peptidase inhibitor, clade A, member 3N [Source:MGI Symbol;Acc:MGI:105045]
ENSMUSG00000062278	-5.68335	5.6382e-49	Gm11562	predicted gene 11562 [Source:MGI Symbol;Acc:MGI:3652059]
ENSMUSG00000026822	6.07043	5.87575e-48	Lcn2	lipocalin 2 [Source:MGI Symbol;Acc:MGI:96757]
ENSMUSG00000058427	10.5156	1.94649e-47	Cxcl2	chemokine (C-X-C motif) ligand 2 [Source:MGI Symbol;Acc:MGI:1340094]
ENSMUSG00000027398	5.9877	1.06015e-45	Il1b	interleukin 1 beta [Source:MGI Symbol;Acc:MGI:96543]
ENSMUSG00000078257	-8.52766	1.45775e-45	2300003K06Rik	RIKEN cDNA 2300003K06 gene [Source:MGI Symbol;Acc:MGI:1916701]
ENSMUSG00000078131	-5.4731	2.56683e-45	Krtap1-3	keratin associated protein 1-3 [Source:MGI Symbol;Acc:MGI:3650443]
ENSMUSG00000052316	-4.43966	4.46399e-45	Lrrc15	leucine rich repeat containing 15 [Source:MGI Symbol;Acc:MGI:1921738]
ENSMUSG00000075566	-5.80122	1.32703e-44	Krtap4-6	keratin associated protein 4-6 [Source:MGI Symbol;Acc:MGI:1916018]
ENSMUSG00000043485	-4.25072	4.35322e-42	Krt34	keratin 34 [Source:MGI Symbol;Acc:MGI:1309994]
ENSMUSG00000071471	-5.21899	7.32994e-42	Krtap26-1	keratin associated protein 26-1 [Source:MGI Symbol;Acc:MGI:1916783]
ENSMUSG00000018924	-4.39185	8.34316e-41	Alox15	arachidonate 15-lipoxygenase [Source:MGI Symbol;Acc:MGI:87997]
ENSMUSG00000067614	-4.29032	8.34316e-41	Krt86	keratin 86 [Source:MGI Symbol;Acc:MGI:109362]
ENSMUSG00000042212	6.54811	9.31729e-41	Sprr2d	small proline-rich protein 2D [Source:MGI Symbol;Acc:MGI:1330347]
ENSMUSG00000078258	-6.43228	2.16768e-40	Gm11564	predicted gene 11564 [Source:MGI Symbol;Acc:MGI:3650329]
ENSMUSG00000060756	-4.98232	4.68327e-40	Krtap2-4	keratin associated protein 2-4 [Source:MGI Symbol;Acc:MGI:1918703]
ENSMUSG00000009047	-4.14256	1.68016e-39	Gm5965	predicted gene 5965 [Source:MGI Symbol;Acc:MGI:3645197]
ENSMUSG00000068262	-5.76819	8.83376e-39	Gm5879	predicted gene 5879 [Source:MGI Symbol;Acc:MGI:3647624]
ENSMUSG00000078130	-8.163	3.18211e-38	Gm11555	predicted gene 11555 [Source:MGI Symbol;Acc:MGI:3651823]
ENSMUSG00000057723	-4.32856	5.15203e-38	Krt33b	keratin 33B [Source:MGI Symbol;Acc:MGI:1309991]
ENSMUSG00000031880	4.77622	1.71468e-37	Rrad	Ras-related associated with diabetes [Source:MGI Symbol;Acc:MGI:1930943]
ENSMUSG00000048981	-3.98832	1.07585e-36	Krt31	keratin 31 [Source:MGI Symbol;Acc:MGI:1309993]
ENSMUSG00000049809	-4.46471	1.14602e-35	Krtap9-3	keratin associated protein 9-3 [Source:MGI Symbol;Acc:MGI:1922836]
ENSMUSG00000050635	6.15804	2.14499e-33	Sprr2f	small proline-rich protein 2F [Source:MGI Symbol;Acc:MGI:1330349]
ENSMUSG00000016194	4.54388	1.89923e-32	Hsd11b1	hydroxysteroid 11-beta dehydrogenase 1 [Source:MGI Symbol;Acc:MGI:103562]
ENSMUSG00000057674	-4.30916	2.19193e-32	Gm11938	predicted gene 11938 [Source:MGI Symbol;Acc:MGI:3651233]
ENSMUSG00000075567	-5.24964	2.35025e-32	Krtap1-4	keratin associated protein 1-4 [Source:MGI Symbol;Acc:MGI:3651229]
ENSMUSG00000050063	7.17689	4.0151e-32	Klk6	kallikrein related-peptidase 6 [Source:MGI Symbol;Acc:MGI:1343166]
ENSMUSG00000048830	-3.75559	4.18776e-32	2310057N15Rik	RIKEN cDNA 2310057N15 gene [Source:MGI Symbol;Acc:MGI:1916946]
ENSMUSG00000063779	-3.54142	1.31354e-31	Chil4	chitinase-like 4 [Source:MGI Symbol;Acc:MGI:1341098]
ENSMUSG00000033520	4.15665	1.59411e-31	Idi2	isopentenyl-diphosphate delta isomerase 2 [Source:MGI Symbol;Acc:MGI:2444315]
ENSMUSG00000116336	-3.62876	3.16114e-30	Gm49425	predicted gene, 49425 [Source:MGI Symbol;Acc:MGI:6155060]
ENSMUSG00000029371	8.65044	6.33921e-30	Cxcl5	chemokine (C-X-C motif) ligand 5 [Source:MGI Symbol;Acc:MGI:1096868]
ENSMUSG00000045349	5.8783	1.62901e-29	Sh2d5	SH2 domain containing 5 [Source:MGI Symbol;Acc:MGI:2446215]
ENSMUSG00000056350	-3.37062	7.63659e-28	Krtap13-1	keratin associated protein 13-1 [Source:MGI Symbol;Acc:MGI:2146359]
ENSMUSG00000067615	-3.39472	1.46426e-27	Krt81	keratin 81 [Source:MGI Symbol;Acc:MGI:1928858]
ENSMUSG00000061100	-3.45132	2.49268e-27	Retnla	resistin like alpha [Source:MGI Symbol;Acc:MGI:1888504]
ENSMUSG00000029380	7.42791	1.18953e-26	Cxcl1	chemokine (C-X-C motif) ligand 1 [Source:MGI Symbol;Acc:MGI:108068]
ENSMUSG00000001131	4.58647	6.07397e-26	Timp1	tissue inhibitor of metalloproteinase 1 [Source:MGI Symbol;Acc:MGI:98752]
ENSMUSG00000029372	4.95782	1.27731e-25	Ppbp	pro-platelet basic protein [Source:MGI Symbol;Acc:MGI:1888712]
ENSMUSG00000030144	7.4141	1.37491e-25	Clec4d	C-type lectin domain family 4, member d [Source:MGI Symbol;Acc:MGI:1298389]
ENSMUSG00000026420	10	1.60362e-25	Il24	interleukin 24 [Source:MGI Symbol;Acc:MGI:2135548]
ENSMUSG00000050224	-3.21228	2.08085e-25	Krtap13	keratin associated protein 13 [Source:MGI Symbol;Acc:MGI:1330835]
ENSMUSG00000078664	4.79953	2.79669e-25	Sprr2a1	small proline-rich protein 2A1 [Source:MGI Symbol;Acc:MGI:1330350]
ENSMUSG00000047253	-5.47272	5.75691e-25	Krtap1-5	keratin associated protein 1-5 [Source:MGI Symbol;Acc:MGI:1916914]
ENSMUSG00000042265	8.24054	1.30448e-24	Trem1	triggering receptor expressed on myeloid cells 1 [Source:MGI Symbol;Acc:MGI:1930005]
ENSMUSG00000064165	-4.03423	1.98995e-24	Krt39	keratin 39 [Source:MGI Symbol;Acc:MGI:3588208]
ENSMUSG00000068078	-3.11939	7.71273e-24	2310034C09Rik	RIKEN cDNA 2310034C09 gene [Source:MGI Symbol;Acc:MGI:2152338]
ENSMUSG00000067613	-3.18145	8.88794e-24	Krt83	keratin 83 [Source:MGI Symbol;Acc:MGI:3690448]
ENSMUSG00000025746	6.94962	1.03215e-23	Il6	interleukin 6 [Source:MGI Symbol;Acc:MGI:96559]
ENSMUSG00000015134	4.03734	2.55782e-23	Aldh1a3	aldehyde dehydrogenase family 1, subfamily A3 [Source:MGI Symbol;Acc:MGI:1861722]
ENSMUSG00000001804	-4.18417	3.55621e-23	Dsg4	desmoglein 4 [Source:MGI Symbol;Acc:MGI:2661061]
ENSMUSG00000028859	4.79397	5.14339e-23	Csf3r	colony stimulating factor 3 receptor (granulocyte) [Source:MGI Symbol;Acc:MGI:1339755]
ENSMUSG00000069721	-3.15197	5.14339e-23	Krtap3-2	keratin associated protein 3-2 [Source:MGI Symbol;Acc:MGI:1913958]
ENSMUSG00000029379	8.10018	5.68557e-23	Cxcl3	chemokine (C-X-C motif) ligand 3 [Source:MGI Symbol;Acc:MGI:3037818]
ENSMUSG00000050704	-3.05786	1.5046e-22	2310061N02Rik	RIKEN cDNA 2310061N02 gene [Source:MGI Symbol;Acc:MGI:1916911]
ENSMUSG00000047641	-2.99812	4.12979e-22	Krt87	keratin 87 [Source:MGI Symbol;Acc:MGI:3665486]
ENSMUSG00000026580	3.59048	8.7223e-22	Selp	selectin, platelet [Source:MGI Symbol;Acc:MGI:98280]
ENSMUSG00000022126	6.46238	1.82094e-21	Acod1	aconitate decarboxylase 1 [Source:MGI Symbol;Acc:MGI:103206]
ENSMUSG00000030142	6.3984	1.91056e-21	Clec4e	C-type lectin domain family 4, member e [Source:MGI Symbol;Acc:MGI:1861232]
ENSMUSG00000055030	7.04576	2.11121e-21	Sprr2e	small proline-rich protein 2E [Source:MGI Symbol;Acc:MGI:1330346]
ENSMUSG00000011008	4.99367	1.4381e-20	Mcoln2	mucolipin 2 [Source:MGI Symbol;Acc:MGI:1915529]
ENSMUSG00000022651	6.22089	1.48326e-20	Retnlg	resistin like gamma [Source:MGI Symbol;Acc:MGI:2667763]
ENSMUSG00000103286	10	1.69648e-20	Gm5850	predicted gene 5850 [Source:MGI Symbol;Acc:MGI:3645657]
ENSMUSG00000058725	-4.46581	1.94606e-20	Gm11937	predicted gene 11937 [Source:MGI Symbol;Acc:MGI:3651231]
ENSMUSG00000031936	-3.31743	3.59423e-20	Hephl1	hephaestin-like 1 [Source:MGI Symbol;Acc:MGI:2685355]
ENSMUSG00000027015	-3.37772	1.49376e-19	Cybrd1	cytochrome b reductase 1 [Source:MGI Symbol;Acc:MGI:2654575]
ENSMUSG00000061988	4.27185	9.87309e-19	Rpl10a-ps2	ribosomal protein L10A, pseudogene 2 [Source:MGI Symbol;Acc:MGI:3646227]
ENSMUSG00000022094	3.04127	1.31593e-18	Slc39a14	solute carrier family 39 (zinc transporter), member 14 [Source:MGI Symbol;Acc:MGI:2384851]
ENSMUSG00000064356	-2.64824	2.95606e-18	mt-Atp8	mitochondrially encoded ATP synthase 8 [Source:MGI Symbol;Acc:MGI:99926]
ENSMUSG00000064246	3.59433	3.54642e-18	Chil1	chitinase-like 1 [Source:MGI Symbol;Acc:MGI:1340899]
ENSMUSG00000056758	8.51653	3.76236e-18	Hmga2	high mobility group AT-hook 2 [Source:MGI Symbol;Acc:MGI:101761]
ENSMUSG00000050578	5.85554	5.92611e-18	Mmp13	matrix metallopeptidase 13 [Source:MGI Symbol;Acc:MGI:1340026]
ENSMUSG00000068614	-2.65014	7.17162e-18	Actc1	actin, alpha, cardiac muscle 1 [Source:MGI Symbol;Acc:MGI:87905]
ENSMUSG00000047564	-2.66163	1.97267e-17	Krtap3-1	keratin associated protein 3-1 [Source:MGI Symbol;Acc:MGI:1916723]
ENSMUSG00000074115	3.51355	2.3409e-17	Saa1	serum amyloid A 1 [Source:MGI Symbol;Acc:MGI:98221]
ENSMUSG00000026560	2.86658	2.37684e-17	Fmo9	flavin containing monooxygenase 9 [Source:MGI Symbol;Acc:MGI:3606068]
ENSMUSG00000048489	3.46509	2.37684e-17	Depp1	DEPP1 autophagy regulator [Source:MGI Symbol;Acc:MGI:1918730]
ENSMUSG00000025172	2.9265	2.85749e-17	Ankrd2	ankyrin repeat domain 2 (stretch responsive muscle) [Source:MGI Symbol;Acc:MGI:1861447]
ENSMUSG00000055193	-5.3291	3.1694e-17	Klk15	kallikrein related-peptidase 15 [Source:MGI Symbol;Acc:MGI:2447533]
ENSMUSG00000031722	4.53105	5.40998e-17	Hp	haptoglobin [Source:MGI Symbol;Acc:MGI:96211]
ENSMUSG00000094989	5.31577	8.44587e-17	Rpl9-ps4	ribosomal protein L9, pseudogene 4 [Source:MGI Symbol;Acc:MGI:3704410]
ENSMUSG00000047562	6.2715	3.11333e-16	Mmp10	matrix metallopeptidase 10 [Source:MGI Symbol;Acc:MGI:97007]
ENSMUSG00000032487	3.47897	4.45638e-16	Ptgs2	prostaglandin-endoperoxide synthase 2 [Source:MGI Symbol;Acc:MGI:97798]
ENSMUSG00000082662	7.35584	5.75246e-16	Gm15516	predicted gene 15516 [Source:MGI Symbol;Acc:MGI:3782963]
ENSMUSG00000006014	2.8426	6.03525e-16	Prg4	proteoglycan 4 (megakaryocyte stimulating factor, articular superficial zone protein) [Source:MGI Symbol;Acc:MGI:1891344]
ENSMUSG00000048572	4.28074	1.1898e-15	Tmem252	transmembrane protein 252 [Source:MGI Symbol;Acc:MGI:3583948]
ENSMUSG00000068606	-5.44475	1.41612e-15	Gm4841	predicted gene 4841 [Source:MGI Symbol;Acc:MGI:3643814]
ENSMUSG00000055095	-5.6261	1.56088e-15	Spink6	serine peptidase inhibitor, Kazal type 6 [Source:MGI Symbol;Acc:MGI:3648654]
ENSMUSG00000071637	3.10578	2.07551e-15	Cebpd	CCAAT/enhancer binding protein (C/EBP), delta [Source:MGI Symbol;Acc:MGI:103573]
ENSMUSG00000025491	3.65648	3.2253e-15	Ifitm1	interferon induced transmembrane protein 1 [Source:MGI Symbol;Acc:MGI:1915963]
ENSMUSG00000028364	2.73366	4.15326e-15	Tnc	tenascin C [Source:MGI Symbol;Acc:MGI:101922]
ENSMUSG00000037095	2.83113	4.49597e-15	Lrg1	leucine-rich alpha-2-glycoprotein 1 [Source:MGI Symbol;Acc:MGI:1924155]
ENSMUSG00000042157	2.80217	5.20885e-15	Sprr2i	small proline-rich protein 2I [Source:MGI Symbol;Acc:MGI:1330309]
ENSMUSG00000089645	7.96245	9.78266e-15	Gm5766	predicted gene 5766 [Source:MGI Symbol;Acc:MGI:3643508]
ENSMUSG00000044338	-2.68875	1.59124e-14	Aplnr	apelin receptor [Source:MGI Symbol;Acc:MGI:1346086]
ENSMUSG00000048294	-5.68778	1.78527e-14	Krtap4-13	keratin associated protein 4-13 [Source:MGI Symbol;Acc:MGI:1916714]
ENSMUSG00000040809	4.26811	2.25779e-14	Chil3	chitinase-like 3 [Source:MGI Symbol;Acc:MGI:1330860]
ENSMUSG00000018907	-4.4725	4.74992e-14	Alox12e	arachidonate lipoxygenase, epidermal [Source:MGI Symbol;Acc:MGI:1274790]
ENSMUSG00000028037	-3.42893	5.13296e-14	Ifi44	interferon-induced protein 44 [Source:MGI Symbol;Acc:MGI:2443016]
ENSMUSG00000047798	5.49446	7.86734e-14	Cd300lf	CD300 molecule like family member F [Source:MGI Symbol;Acc:MGI:2442359]
ENSMUSG00000045331	-2.46378	7.8981e-14	2310079G19Rik	RIKEN cDNA 2310079G19 gene [Source:MGI Symbol;Acc:MGI:1916949]
ENSMUSG00000053113	2.52713	1.70881e-13	Socs3	suppressor of cytokine signaling 3 [Source:MGI Symbol;Acc:MGI:1201791]
ENSMUSG00000048013	-2.40843	1.72534e-13	Krt35	keratin 35 [Source:MGI Symbol;Acc:MGI:1858899]
ENSMUSG00000069722	-2.30675	1.78125e-13	Krtap3-3	keratin associated protein 3-3 [Source:MGI Symbol;Acc:MGI:1913630]
ENSMUSG00000117123	3.31376	3.43395e-13	Gm49890	predicted gene, 49890 [Source:MGI Symbol;Acc:MGI:6270578]
ENSMUSG00000038067	10	4.35019e-13	Csf3	colony stimulating factor 3 (granulocyte) [Source:MGI Symbol;Acc:MGI:1339751]
ENSMUSG00000048852	-4.89399	4.7512e-13	Gm12185	predicted gene 12185 [Source:MGI Symbol;Acc:MGI:3652173]
ENSMUSG00000087684	4.95948	4.93166e-13	1200007C13Rik	RIKEN cDNA 1200007C13 gene [Source:MGI Symbol;Acc:MGI:1921369]
ENSMUSG00000021509	3.17668	8.46635e-13	Slc25a48	solute carrier family 25, member 48 [Source:MGI Symbol;Acc:MGI:2145373]
ENSMUSG00000045551	10	1.09858e-12	Fpr1	formyl peptide receptor 1 [Source:MGI Symbol;Acc:MGI:107443]
ENSMUSG00000030205	-5.56373	1.52648e-12	Gprc5d	G protein-coupled receptor, family C, group 5, member D [Source:MGI Symbol;Acc:MGI:1935037]
ENSMUSG00000049303	3.4201	3.8733e-12	Syt12	synaptotagmin XII [Source:MGI Symbol;Acc:MGI:2159601]
ENSMUSG00000074547	4.76648	3.96304e-12	Rps8-ps4	ribosomal protein S8, pseudogene 4 [Source:MGI Symbol;Acc:MGI:3809043]
ENSMUSG00000078259	-10	4.41083e-12	Gm11554	predicted gene 11554 [Source:MGI Symbol;Acc:MGI:3705237]
ENSMUSG00000024512	-2.15157	4.64553e-12	Dynap	dynactin associated protein [Source:MGI Symbol;Acc:MGI:1922827]
ENSMUSG00000051439	2.85814	5.02754e-12	Cd14	CD14 antigen [Source:MGI Symbol;Acc:MGI:88318]
ENSMUSG00000058914	-3.56608	5.20998e-12	C1qtnf3	C1q and tumor necrosis factor related protein 3 [Source:MGI Symbol;Acc:MGI:1932136]
ENSMUSG00000056270	-2.36904	6.21631e-12	Prr9	proline rich 9 [Source:MGI Symbol;Acc:MGI:1925680]
ENSMUSG00000007682	2.35052	6.5852e-12	Dio2	deiodinase, iodothyronine, type II [Source:MGI Symbol;Acc:MGI:1338833]
ENSMUSG00000059657	10	7.09703e-12	Stfa2l1	stefin A2 like 1 [Source:MGI Symbol;Acc:MGI:3524944]
ENSMUSG00000049723	3.79551	8.32431e-12	Mmp12	matrix metallopeptidase 12 [Source:MGI Symbol;Acc:MGI:97005]
ENSMUSG00000029561	-2.27022	1.15868e-11	Oasl2	2'-5' oligoadenylate synthetase-like 2 [Source:MGI Symbol;Acc:MGI:1344390]
ENSMUSG00000038641	6.54388	1.49274e-11	Akr1d1	aldo-keto reductase family 1, member D1 [Source:MGI Symbol;Acc:MGI:2384785]
ENSMUSG00000073060	-7.06998	1.51763e-11	Zxda	zinc finger, X-linked, duplicated A [Source:MGI Symbol;Acc:MGI:1921689]
ENSMUSG00000057465	6.69623	1.54553e-11	Saa2	serum amyloid A 2 [Source:MGI Symbol;Acc:MGI:98222]
ENSMUSG00000029762	2.50348	2.4268e-11	Akr1b8	aldo-keto reductase family 1, member B8 [Source:MGI Symbol;Acc:MGI:107673]
ENSMUSG00000046203	3.15924	2.73983e-11	Sprr2g	small proline-rich protein 2G [Source:MGI Symbol;Acc:MGI:1330348]
ENSMUSG00000000982	6.18878	3.10071e-11	Ccl3	chemokine (C-C motif) ligand 3 [Source:MGI Symbol;Acc:MGI:98260]
ENSMUSG00000021148	4.85257	3.28759e-11	Gm9745	predicted gene 9745 [Source:MGI Symbol;Acc:MGI:3704398]
ENSMUSG00000079597	10	5.14183e-11	Cstdc4	cystatin domain containing 4 [Source:MGI Symbol;Acc:MGI:3645124]
ENSMUSG00000082465	4.32765	5.4614e-11	Rps6-ps3	ribosomal protein S6, pseudogene 3 [Source:MGI Symbol;Acc:MGI:3643565]
ENSMUSG00000005800	5.02169	5.50223e-11	Mmp8	matrix metallopeptidase 8 [Source:MGI Symbol;Acc:MGI:1202395]
ENSMUSG00000026085	-2.28917	5.78675e-11	Lyg1	lysozyme G-like 1 [Source:MGI Symbol;Acc:MGI:1916791]
ENSMUSG00000027360	2.92079	6.00451e-11	Hdc	histidine decarboxylase [Source:MGI Symbol;Acc:MGI:96062]
ENSMUSG00000040675	3.16392	1.13413e-10	Mthfd1l	methylenetetrahydrofolate dehydrogenase (NADP+ dependent) 1-like [Source:MGI Symbol;Acc:MGI:1924836]
ENSMUSG00000046223	2.98089	1.39874e-10	Plaur	plasminogen activator, urokinase receptor [Source:MGI Symbol;Acc:MGI:97612]
ENSMUSG00000069792	2.84693	1.45494e-10	Wfdc17	WAP four-disulfide core domain 17 [Source:MGI Symbol;Acc:MGI:3649773]
ENSMUSG00000031765	2.25647	1.51972e-10	Mt1	metallothionein 1 [Source:MGI Symbol;Acc:MGI:97171]
ENSMUSG00000058755	4.4795	1.70286e-10	Osm	oncostatin M [Source:MGI Symbol;Acc:MGI:104749]
ENSMUSG00000037411	2.67712	1.76576e-10	Serpine1	serine (or cysteine) peptidase inhibitor, clade E, member 1 [Source:MGI Symbol;Acc:MGI:97608]
ENSMUSG00000069117	4.50891	1.89336e-10	Gm10260	predicted gene 10260 [Source:MGI Symbol;Acc:MGI:3642298]
ENSMUSG00000078260	-6.34708	2.10108e-10	Gm11569	predicted gene 11569 [Source:MGI Symbol;Acc:MGI:3709346]
ENSMUSG00000116174	4.8549	2.2821e-10	Gm10362	predicted gene 10362 [Source:MGI Symbol;Acc:MGI:3642619]
ENSMUSG00000032511	3.54504	2.40936e-10	Scn5a	sodium channel, voltage-gated, type V, alpha [Source:MGI Symbol;Acc:MGI:98251]
ENSMUSG00000034459	-2.41873	2.41155e-10	Ifit1	interferon-induced protein with tetratricopeptide repeats 1 [Source:MGI Symbol;Acc:MGI:99450]
ENSMUSG00000030483	2.9491	5.07636e-10	Cyp2b10	cytochrome P450, family 2, subfamily b, polypeptide 10 [Source:MGI Symbol;Acc:MGI:88598]
ENSMUSG00000029417	-3.35214	6.80583e-10	Cxcl9	chemokine (C-X-C motif) ligand 9 [Source:MGI Symbol;Acc:MGI:1352449]
ENSMUSG00000032068	3.28443	7.10621e-10	Plet1	placenta expressed transcript 1 [Source:MGI Symbol;Acc:MGI:1923759]
ENSMUSG00000024222	2.12861	8.27682e-10	Fkbp5	FK506 binding protein 5 [Source:MGI Symbol;Acc:MGI:104670]
ENSMUSG00000062038	-5.8887	1.10852e-09	Gm10108	predicted pseudogene 10108 [Source:MGI Symbol;Acc:MGI:3642431]
ENSMUSG00000042109	-2.49584	1.1308e-09	Csdc2	cold shock domain containing C2, RNA binding [Source:MGI Symbol;Acc:MGI:2146027]
ENSMUSG00000021263	3.10568	1.44397e-09	Degs2	delta(4)-desaturase, sphingolipid 2 [Source:MGI Symbol;Acc:MGI:1917309]
ENSMUSG00000042834	-1.96804	1.60512e-09	Nrep	neuronal regeneration related protein [Source:MGI Symbol;Acc:MGI:99444]
ENSMUSG00000087006	2.80973	1.78238e-09	Gm13889	predicted gene 13889 [Source:MGI Symbol;Acc:MGI:3652053]
ENSMUSG00000013415	6.10484	1.94141e-09	Igf2bp1	insulin-like growth factor 2 mRNA binding protein 1 [Source:MGI Symbol;Acc:MGI:1890357]
ENSMUSG00000026043	-1.99498	2.28228e-09	Col3a1	collagen, type III, alpha 1 [Source:MGI Symbol;Acc:MGI:88453]
ENSMUSG00000027750	-1.95265	2.92479e-09	Postn	periostin, osteoblast specific factor [Source:MGI Symbol;Acc:MGI:1926321]
ENSMUSG00000003545	-2.65353	3.2562e-09	Fosb	FBJ osteosarcoma oncogene B [Source:MGI Symbol;Acc:MGI:95575]
ENSMUSG00000032661	-2.88569	5.16817e-09	Oas3	2'-5' oligoadenylate synthetase 3 [Source:MGI Symbol;Acc:MGI:2180850]
ENSMUSG00000020183	-1.9801	5.17102e-09	Cpm	carboxypeptidase M [Source:MGI Symbol;Acc:MGI:1917824]
ENSMUSG00000026582	2.87012	5.17831e-09	Sele	selectin, endothelial cell [Source:MGI Symbol;Acc:MGI:98278]
ENSMUSG00000052270	6.15319	5.17831e-09	Fpr2	formyl peptide receptor 2 [Source:MGI Symbol;Acc:MGI:1278319]
ENSMUSG00000035692	-2.12523	7.26414e-09	Isg15	ISG15 ubiquitin-like modifier [Source:MGI Symbol;Acc:MGI:1855694]
ENSMUSG00000057346	-3.14403	7.73116e-09	Apol9a	apolipoprotein L 9a [Source:MGI Symbol;Acc:MGI:3606001]
ENSMUSG00000024803	1.99943	8.87423e-09	Ankrd1	ankyrin repeat domain 1 (cardiac muscle) [Source:MGI Symbol;Acc:MGI:1097717]
ENSMUSG00000006403	3.01039	1.24094e-08	Adamts4	a disintegrin-like and metallopeptidase (reprolysin type) with thrombospondin type 1 motif, 4 [Source:MGI Symbol;Acc:MGI:1339949]
ENSMUSG00000110588	5.91905	1.32996e-08	Gm45774	predicted gene 45774 [Source:MGI Symbol;Acc:MGI:5804889]
ENSMUSG00000016524	6.70713	1.33473e-08	Il19	interleukin 19 [Source:MGI Symbol;Acc:MGI:1890472]
ENSMUSG00000100755	2.67708	1.33473e-08	Rps23-ps1	ribosomal protein S23, pseudogene 1 [Source:MGI Symbol;Acc:MGI:3705429]
ENSMUSG00000090314	-1.8877	1.55738e-08	2310050C09Rik	RIKEN cDNA 2310050C09 gene [Source:MGI Symbol;Acc:MGI:1913783]
ENSMUSG00000080078	6.69527	1.8812e-08	Gm15583	predicted gene 15583 [Source:MGI Symbol;Acc:MGI:3783031]
ENSMUSG00000018930	5.49045	2.02628e-08	Ccl4	chemokine (C-C motif) ligand 4 [Source:MGI Symbol;Acc:MGI:98261]
ENSMUSG00000101660	-4.99844	2.16953e-08	Gm18666	predicted gene, 18666 [Source:MGI Symbol;Acc:MGI:5010851]
ENSMUSG00000042436	-1.88377	2.71191e-08	Mfap4	microfibrillar-associated protein 4 [Source:MGI Symbol;Acc:MGI:1342276]
ENSMUSG00000027737	1.94708	2.9149e-08	Slc7a11	solute carrier family 7 (cationic amino acid transporter, y+ system), member 11 [Source:MGI Symbol;Acc:MGI:1347355]
ENSMUSG00000040152	1.9622	3.29967e-08	Thbs1	thrombospondin 1 [Source:MGI Symbol;Acc:MGI:98737]
ENSMUSG00000112474	4.66579	3.63231e-08	Gm46209	predicted gene, 46209 [Source:MGI Symbol;Acc:MGI:5825846]
ENSMUSG00000001506	-1.76691	3.76373e-08	Col1a1	collagen, type I, alpha 1 [Source:MGI Symbol;Acc:MGI:88467]
ENSMUSG00000026581	3.6264	4.00191e-08	Sell	selectin, lymphocyte [Source:MGI Symbol;Acc:MGI:98279]
ENSMUSG00000030022	2.23607	4.14145e-08	Adamts9	a disintegrin-like and metallopeptidase (reprolysin type) with thrombospondin type 1 motif, 9 [Source:MGI Symbol;Acc:MGI:1916320]
ENSMUSG00000020641	-2.48346	4.38653e-08	Rsad2	radical S-adenosyl methionine domain containing 2 [Source:MGI Symbol;Acc:MGI:1929628]
ENSMUSG00000035279	-2.32082	4.52411e-08	Ssc5d	scavenger receptor cysteine rich family, 5 domains [Source:MGI Symbol;Acc:MGI:3606211]
ENSMUSG00000074280	2.02801	4.52411e-08	Gm6166	predicted gene 6166 [Source:MGI Symbol;Acc:MGI:3645893]
ENSMUSG00000090515	-3.1272	4.59429e-08	Krtap27-1	keratin associated protein 27-1 [Source:MGI Symbol;Acc:MGI:3646229]
ENSMUSG00000026193	-1.7767	4.84234e-08	Fn1	fibronectin 1 [Source:MGI Symbol;Acc:MGI:95566]
ENSMUSG00000097767	-2.89486	5.29741e-08	Miat	myocardial infarction associated transcript (non-protein coding) [Source:MGI Symbol;Acc:MGI:2444886]
ENSMUSG00000024521	2.95016	5.69435e-08	Pmaip1	phorbol-12-myristate-13-acetate-induced protein 1 [Source:MGI Symbol;Acc:MGI:1930146]
ENSMUSG00000035805	-4.14241	7.09757e-08	Mlc1	megalencephalic leukoencephalopathy with subcortical cysts 1 homolog (human) [Source:MGI Symbol;Acc:MGI:2157910]
ENSMUSG00000079017	-1.82977	7.3899e-08	Ifi27l2a	interferon, alpha-inducible protein 27 like 2A [Source:MGI Symbol;Acc:MGI:1924183]
ENSMUSG00000027925	2.49591	7.83437e-08	Sprr2j-ps	small proline-rich protein 2J, pseudogene [Source:MGI Symbol;Acc:MGI:1330345]
ENSMUSG00000022548	1.85507	9.07522e-08	Apod	apolipoprotein D [Source:MGI Symbol;Acc:MGI:88056]
ENSMUSG00000032691	3.76718	9.07522e-08	Nlrp3	NLR family, pyrin domain containing 3 [Source:MGI Symbol;Acc:MGI:2653833]
ENSMUSG00000032690	-2.11915	1.01912e-07	Oas2	2'-5' oligoadenylate synthetase 2 [Source:MGI Symbol;Acc:MGI:2180852]
ENSMUSG00000005410	2.08999	1.0587e-07	Mcm5	minichromosome maintenance complex component 5 [Source:MGI Symbol;Acc:MGI:103197]
ENSMUSG00000042254	-1.70933	1.39543e-07	Cilp	cartilage intermediate layer protein, nucleotide pyrophosphohydrolase [Source:MGI Symbol;Acc:MGI:2444507]
ENSMUSG00000061540	10	1.48264e-07	Orm2	orosomucoid 2 [Source:MGI Symbol;Acc:MGI:97444]
ENSMUSG00000030748	1.87029	1.56948e-07	Il4ra	interleukin 4 receptor, alpha [Source:MGI Symbol;Acc:MGI:105367]
ENSMUSG00000071547	2.0839	1.56948e-07	Nt5dc2	5'-nucleotidase domain containing 2 [Source:MGI Symbol;Acc:MGI:1917271]
ENSMUSG00000026989	-1.78159	1.62026e-07	Dapl1	death associated protein-like 1 [Source:MGI Symbol;Acc:MGI:1923997]
ENSMUSG00000023078	2.35116	1.62933e-07	Cxcl13	chemokine (C-X-C motif) ligand 13 [Source:MGI Symbol;Acc:MGI:1888499]
ENSMUSG00000042485	1.8612	1.74343e-07	Mustn1	musculoskeletal, embryonic nuclear protein 1 [Source:MGI Symbol;Acc:MGI:1913425]
ENSMUSG00000053654	-2.56247	1.9221e-07	Krt42	keratin 42 [Source:MGI Symbol;Acc:MGI:1915489]
ENSMUSG00000078896	-10	2.03143e-07	Zfp965	zinc finger protein 965 [Source:MGI Symbol;Acc:MGI:3779822]
ENSMUSG00000037280	2.42037	2.28098e-07	Galnt6	polypeptide N-acetylgalactosaminyltransferase 6 [Source:MGI Symbol;Acc:MGI:1891640]
ENSMUSG00000094338	-10	2.39368e-07	Hist1h2bl	histone cluster 1, H2bl [Source:MGI Symbol;Acc:MGI:2448403]
ENSMUSG00000018339	1.83151	2.59214e-07	Gpx3	glutathione peroxidase 3 [Source:MGI Symbol;Acc:MGI:105102]
ENSMUSG00000024679	2.55135	3.25015e-07	Ms4a6d	membrane-spanning 4-domains, subfamily A, member 6D [Source:MGI Symbol;Acc:MGI:1916024]
ENSMUSG00000027895	1.82592	3.8888e-07	Kcnc4	potassium voltage gated channel, Shaw-related subfamily, member 4 [Source:MGI Symbol;Acc:MGI:96670]
ENSMUSG00000029581	1.92604	4.11771e-07	Fscn1	fascin actin-bundling protein 1 [Source:MGI Symbol;Acc:MGI:1352745]
ENSMUSG00000022180	1.89472	4.18199e-07	Slc7a8	solute carrier family 7 (cationic amino acid transporter, y+ system), member 8 [Source:MGI Symbol;Acc:MGI:1355323]
ENSMUSG00000029378	2.61841	4.35598e-07	Areg	amphiregulin [Source:MGI Symbol;Acc:MGI:88068]
ENSMUSG00000022044	-2.88064	4.75274e-07	Stmn4	stathmin-like 4 [Source:MGI Symbol;Acc:MGI:1931224]
ENSMUSG00000068893	3.76207	6.09402e-07	Sprr2a2	small proline-rich protein 2A2 [Source:MGI Symbol;Acc:MGI:3845026]
ENSMUSG00000020916	-2.02522	6.67573e-07	Krt36	keratin 36 [Source:MGI Symbol;Acc:MGI:109364]
ENSMUSG00000116659	1.76267	6.70039e-07	Gm6551	predicted gene 6551 [Source:MGI Symbol;Acc:MGI:3644103]
ENSMUSG00000086513	-4.59298	6.78975e-07	9130208D14Rik	RIKEN cDNA 9130208D14 gene [Source:MGI Symbol;Acc:MGI:1924950]
ENSMUSG00000074183	2.2214	6.96843e-07	Gsta1	glutathione S-transferase, alpha 1 (Ya) [Source:MGI Symbol;Acc:MGI:1095417]
ENSMUSG00000015143	1.77352	7.05339e-07	Actn1	actinin, alpha 1 [Source:MGI Symbol;Acc:MGI:2137706]
ENSMUSG00000078894	-3.81193	7.50649e-07	2210418O10Rik	RIKEN cDNA 2210418O10 gene [Source:MGI Symbol;Acc:MGI:1924208]
ENSMUSG00000022229	-3.63918	7.56698e-07	Atp12a	ATPase, H+/K+ transporting, nongastric, alpha polypeptide [Source:MGI Symbol;Acc:MGI:1926943]
ENSMUSG00000027204	-1.58658	7.97278e-07	Fbn1	fibrillin 1 [Source:MGI Symbol;Acc:MGI:95489]
ENSMUSG00000049892	2.41067	8.27144e-07	Rasd1	RAS, dexamethasone-induced 1 [Source:MGI Symbol;Acc:MGI:1270848]
ENSMUSG00000086056	3.97126	8.85261e-07	Gm4846	predicted gene 4846 [Source:MGI Symbol;Acc:MGI:3643319]
ENSMUSG00000068303	-6.34052	9.51757e-07	Spr-ps1	sepiapterin reductase pseudogene 1 [Source:MGI Symbol;Acc:MGI:1345187]
ENSMUSG00000054072	-1.79298	1.01496e-06	Iigp1	interferon inducible GTPase 1 [Source:MGI Symbol;Acc:MGI:1926259]
ENSMUSG00000020684	2.45941	1.05699e-06	Rasl10b	RAS-like, family 10, member B [Source:MGI Symbol;Acc:MGI:2685575]
ENSMUSG00000023349	3.62207	1.05699e-06	Clec4n	C-type lectin domain family 4, member n [Source:MGI Symbol;Acc:MGI:1861231]
ENSMUSG00000031762	1.83305	1.05699e-06	Mt2	metallothionein 2 [Source:MGI Symbol;Acc:MGI:97172]
ENSMUSG00000039196	5.49993	1.07633e-06	Orm1	orosomucoid 1 [Source:MGI Symbol;Acc:MGI:97443]
ENSMUSG00000038259	3.91088	1.1157e-06	Gdf5	growth differentiation factor 5 [Source:MGI Symbol;Acc:MGI:95688]
ENSMUSG00000021388	-1.69135	1.18569e-06	Aspn	asporin [Source:MGI Symbol;Acc:MGI:1913945]
ENSMUSG00000020893	1.75913	1.35353e-06	Per1	period circadian clock 1 [Source:MGI Symbol;Acc:MGI:1098283]
ENSMUSG00000075605	-1.90077	1.38247e-06	Slurp2	secreted Ly6/Plaur domain containing 2 [Source:MGI Symbol;Acc:MGI:1916712]
ENSMUSG00000048699	2.63741	1.55177e-06	Krt90	keratin 90 [Source:MGI Symbol;Acc:MGI:3045312]
ENSMUSG00000002289	2.15564	1.58284e-06	Angptl4	angiopoietin-like 4 [Source:MGI Symbol;Acc:MGI:1888999]
ENSMUSG00000095419	1.95018	1.6555e-06	Gm14328	predicted gene 14328 [Source:MGI Symbol;Acc:MGI:3651951]
ENSMUSG00000025780	-1.72926	1.7403e-06	Itih5	inter-alpha (globulin) inhibitor H5 [Source:MGI Symbol;Acc:MGI:1925751]
ENSMUSG00000078253	-5.28046	1.82095e-06	Krtap16-1	keratin associated protein 16-1 [Source:MGI Symbol;Acc:MGI:3650326]
ENSMUSG00000025804	2.53976	1.90311e-06	Ccr1	chemokine (C-C motif) receptor 1 [Source:MGI Symbol;Acc:MGI:104618]
ENSMUSG00000036790	-3.01093	1.91062e-06	Slitrk2	SLIT and NTRK-like family, member 2 [Source:MGI Symbol;Acc:MGI:2679449]
ENSMUSG00000044294	-1.87244	1.99983e-06	Krt84	keratin 84 [Source:MGI Symbol;Acc:MGI:96700]
ENSMUSG00000027403	-2.4261	2.0469e-06	Tgm6	transglutaminase 6 [Source:MGI Symbol;Acc:MGI:3044321]
ENSMUSG00000037447	1.82551	2.07434e-06	Arid5a	AT rich interactive domain 5A (MRF1-like) [Source:MGI Symbol;Acc:MGI:2443039]
ENSMUSG00000048776	2.40238	2.14447e-06	Pthlh	parathyroid hormone-like peptide [Source:MGI Symbol;Acc:MGI:97800]
ENSMUSG00000009185	2.58581	2.24084e-06	Ccl8	chemokine (C-C motif) ligand 8 [Source:MGI Symbol;Acc:MGI:101878]
ENSMUSG00000024409	-1.63582	2.29107e-06	Psors1c2	psoriasis susceptibility 1 candidate 2 (human) [Source:MGI Symbol;Acc:MGI:1930025]
ENSMUSG00000022371	-1.63677	2.31293e-06	Col14a1	collagen, type XIV, alpha 1 [Source:MGI Symbol;Acc:MGI:1341272]
ENSMUSG00000029816	1.97385	2.32188e-06	Gpnmb	glycoprotein (transmembrane) nmb [Source:MGI Symbol;Acc:MGI:1934765]
ENSMUSG00000043631	-1.74301	2.36489e-06	Ecm2	extracellular matrix protein 2, female organ and adipocyte specific [Source:MGI Symbol;Acc:MGI:3039578]
ENSMUSG00000024529	2.02463	2.3805e-06	Lox	lysyl oxidase [Source:MGI Symbol;Acc:MGI:96817]
ENSMUSG00000101389	2.6587	2.47681e-06	Ms4a4a	membrane-spanning 4-domains, subfamily A, member 4A [Source:MGI Symbol;Acc:MGI:3643932]
ENSMUSG00000053338	6.16114	2.61276e-06	Tarm1	T cell-interacting, activating receptor on myeloid cells 1 [Source:MGI Symbol;Acc:MGI:2442280]
ENSMUSG00000034394	2.70619	2.67915e-06	Lif	leukemia inhibitory factor [Source:MGI Symbol;Acc:MGI:96787]
ENSMUSG00000030107	-2.36805	2.68518e-06	Usp18	ubiquitin specific peptidase 18 [Source:MGI Symbol;Acc:MGI:1344364]
ENSMUSG00000079942	-2.45244	2.74882e-06	Rpl28-ps3	ribosomal protein L28, pseudogene 3 [Source:MGI Symbol;Acc:MGI:3650282]
ENSMUSG00000067235	4.26051	2.94235e-06	H2-Q10	histocompatibility 2, Q region locus 10 [Source:MGI Symbol;Acc:MGI:95929]
ENSMUSG00000027832	2.27124	3.07791e-06	Ptx3	pentraxin related gene [Source:MGI Symbol;Acc:MGI:104641]
ENSMUSG00000028268	-1.86053	3.21992e-06	Gbp3	guanylate binding protein 3 [Source:MGI Symbol;Acc:MGI:1926263]
ENSMUSG00000085183	5.95333	3.55484e-06	Wincr1	WNT induced non-coding RNA 1 [Source:MGI Symbol;Acc:MGI:3649757]
ENSMUSG00000008035	1.63818	3.73314e-06	Mid1ip1	Mid1 interacting protein 1 (gastrulation specific G12-like (zebrafish)) [Source:MGI Symbol;Acc:MGI:1915291]
ENSMUSG00000028525	1.67606	3.84108e-06	Pde4b	phosphodiesterase 4B, cAMP specific [Source:MGI Symbol;Acc:MGI:99557]
ENSMUSG00000040488	-1.56952	4.00452e-06	Ltbp4	latent transforming growth factor beta binding protein 4 [Source:MGI Symbol;Acc:MGI:1321395]
ENSMUSG00000076441	1.66041	4.03716e-06	Ass1	argininosuccinate synthetase 1 [Source:MGI Symbol;Acc:MGI:88090]
ENSMUSG00000060487	-1.69547	4.64057e-06	Samd5	sterile alpha motif domain containing 5 [Source:MGI Symbol;Acc:MGI:2444815]
ENSMUSG00000078157	-2.51213	5.09608e-06	4931440F15Rik	RIKEN cDNA 4931440F15 gene [Source:MGI Symbol;Acc:MGI:2441689]
ENSMUSG00000017861	2.10807	5.13609e-06	Mybl2	myeloblastosis oncogene-like 2 [Source:MGI Symbol;Acc:MGI:101785]
ENSMUSG00000026841	-4.45266	5.67853e-06	Fibcd1	fibrinogen C domain containing 1 [Source:MGI Symbol;Acc:MGI:2138953]
ENSMUSG00000039384	-1.61201	5.75051e-06	Dusp10	dual specificity phosphatase 10 [Source:MGI Symbol;Acc:MGI:1927070]
ENSMUSG00000015443	-2.27293	6.00123e-06	Gzmn	granzyme N [Source:MGI Symbol;Acc:MGI:2675494]
ENSMUSG00000079363	-1.94504	6.36217e-06	Gbp4	guanylate binding protein 4 [Source:MGI Symbol;Acc:MGI:97072]
ENSMUSG00000041347	3.58766	6.85815e-06	Bdkrb1	bradykinin receptor, beta 1 [Source:MGI Symbol;Acc:MGI:88144]
ENSMUSG00000066068	2.27572	7.62731e-06	Gm13611	predicted gene 13611 [Source:MGI Symbol;Acc:MGI:3651300]
ENSMUSG00000046676	-1.56164	8.00139e-06	Lce1l	late cornified envelope 1L [Source:MGI Symbol;Acc:MGI:1920980]
ENSMUSG00000105987	1.61325	8.16641e-06	AI506816	expressed sequence AI506816 [Source:MGI Symbol;Acc:MGI:2140929]
ENSMUSG00000031273	-2.11349	8.17607e-06	Col4a6	collagen, type IV, alpha 6 [Source:MGI Symbol;Acc:MGI:2152695]
ENSMUSG00000026837	-1.52122	8.47137e-06	Col5a1	collagen, type V, alpha 1 [Source:MGI Symbol;Acc:MGI:88457]
ENSMUSG00000041859	1.84943	9.09777e-06	Mcm3	minichromosome maintenance complex component 3 [Source:MGI Symbol;Acc:MGI:101845]
ENSMUSG00000078657	-1.57921	1.05345e-05	Crnn	cornulin [Source:MGI Symbol;Acc:MGI:2685861]
ENSMUSG00000002068	2.34916	1.08078e-05	Ccne1	cyclin E1 [Source:MGI Symbol;Acc:MGI:88316]
ENSMUSG00000002910	1.8915	1.08078e-05	Arrdc2	arrestin domain containing 2 [Source:MGI Symbol;Acc:MGI:1918057]
ENSMUSG00000022596	-1.60946	1.08078e-05	Slurp1	secreted Ly6/Plaur domain containing 1 [Source:MGI Symbol;Acc:MGI:1930923]
ENSMUSG00000026463	-1.46948	1.09948e-05	Atp2b4	ATPase, Ca++ transporting, plasma membrane 4 [Source:MGI Symbol;Acc:MGI:88111]
ENSMUSG00000117545	-2.30385	1.12238e-05	Gm30794	predicted gene, 30794 [Source:MGI Symbol;Acc:MGI:5589953]
ENSMUSG00000104876	3.34954	1.24327e-05	Trdc	T cell receptor delta, constant region [Source:MGI Symbol;Acc:MGI:98612]
ENSMUSG00000025498	-1.71454	1.33227e-05	Irf7	interferon regulatory factor 7 [Source:MGI Symbol;Acc:MGI:1859212]
ENSMUSG00000001655	-1.92154	1.50467e-05	Hoxc13	homeobox C13 [Source:MGI Symbol;Acc:MGI:99560]
ENSMUSG00000034855	-2.52362	1.56902e-05	Cxcl10	chemokine (C-X-C motif) ligand 10 [Source:MGI Symbol;Acc:MGI:1352450]
ENSMUSG00000076498	2.76891	1.56902e-05	Trbc2	T cell receptor beta, constant 2 [Source:MGI Symbol;Acc:MGI:4835227]
ENSMUSG00000064360	-1.66813	1.57515e-05	mt-Nd3	mitochondrially encoded NADH dehydrogenase 3 [Source:MGI Symbol;Acc:MGI:102499]
ENSMUSG00000035557	1.78019	2.13761e-05	Krt17	keratin 17 [Source:MGI Symbol;Acc:MGI:96691]
ENSMUSG00000037921	-2.20492	2.14971e-05	Ddx60	DEAD (Asp-Glu-Ala-Asp) box polypeptide 60 [Source:MGI Symbol;Acc:MGI:2384570]
ENSMUSG00000118497	-3.13462	2.172e-05	AC124764.1	novel protein similar to dynactin associated protein (DYNAP)
ENSMUSG00000037016	-1.64433	2.18372e-05	Frem2	Fras1 related extracellular matrix protein 2 [Source:MGI Symbol;Acc:MGI:2444465]
ENSMUSG00000020241	-1.4593	2.24821e-05	Col6a2	collagen, type VI, alpha 2 [Source:MGI Symbol;Acc:MGI:88460]
ENSMUSG00000081855	-1.96113	2.36929e-05	Rpl17-ps5	ribosomal protein L17, pseudogene 5 [Source:MGI Symbol;Acc:MGI:3704246]
ENSMUSG00000016327	-1.65587	2.44769e-05	Atp1b4	ATPase, (Na+)/K+ transporting, beta 4 polypeptide [Source:MGI Symbol;Acc:MGI:1915071]
ENSMUSG00000044921	-1.62031	2.44769e-05	Rassf9	Ras association (RalGDS/AF-6) domain family (N-terminal) member 9 [Source:MGI Symbol;Acc:MGI:2384307]
ENSMUSG00000085088	4.90561	2.44769e-05	4931413K12Rik	RIKEN cDNA 4931413K12 gene [Source:MGI Symbol;Acc:MGI:1918237]
ENSMUSG00000059921	-2.46337	2.49605e-05	Unc5c	unc-5 netrin receptor C [Source:MGI Symbol;Acc:MGI:1095412]
ENSMUSG00000043439	2.41116	2.70817e-05	Epop	elongin BC and polycomb repressive complex 2 associated protein [Source:MGI Symbol;Acc:MGI:2143991]
ENSMUSG00000078269	-10	2.95086e-05	Gm14180	predicted gene 14180 [Source:MGI Symbol;Acc:MGI:3650017]
ENSMUSG00000019761	-1.56599	3.096e-05	Krt10	keratin 10 [Source:MGI Symbol;Acc:MGI:96685]
ENSMUSG00000115388	-1.4293	3.10307e-05	Eppk1	epiplakin 1 [Source:MGI Symbol;Acc:MGI:2386306]
ENSMUSG00000026180	2.41987	3.20274e-05	Cxcr2	chemokine (C-X-C motif) receptor 2 [Source:MGI Symbol;Acc:MGI:105303]
ENSMUSG00000013974	3.54925	3.31316e-05	Mcemp1	mast cell expressed membrane protein 1 [Source:MGI Symbol;Acc:MGI:1916439]
ENSMUSG00000038059	2.08042	3.31316e-05	Smim3	small integral membrane protein 3 [Source:MGI Symbol;Acc:MGI:1917088]
ENSMUSG00000041567	-1.68959	3.75346e-05	Serpina12	serine (or cysteine) peptidase inhibitor, clade A (alpha-1 antiproteinase, antitrypsin), member 12 [Source:MGI Symbol;Acc:MGI:1915304]
ENSMUSG00000052776	-2.02899	4.49453e-05	Oas1a	2'-5' oligoadenylate synthetase 1A [Source:MGI Symbol;Acc:MGI:2180860]
ENSMUSG00000031508	1.51769	4.56436e-05	Ankrd10	ankyrin repeat domain 10 [Source:MGI Symbol;Acc:MGI:1921840]
ENSMUSG00000068246	-2.38713	4.56436e-05	Apol9b	apolipoprotein L 9b [Source:MGI Symbol;Acc:MGI:1919148]
ENSMUSG00000026255	-1.82017	4.86766e-05	Efhd1	EF hand domain containing 1 [Source:MGI Symbol;Acc:MGI:1921607]
ENSMUSG00000041202	-2.95758	5.07543e-05	Pla2g2d	phospholipase A2, group IID [Source:MGI Symbol;Acc:MGI:1341796]
ENSMUSG00000066861	-2.61128	5.46801e-05	Oas1g	2'-5' oligoadenylate synthetase 1G [Source:MGI Symbol;Acc:MGI:97429]
ENSMUSG00000024659	1.62257	5.65793e-05	Anxa1	annexin A1 [Source:MGI Symbol;Acc:MGI:96819]
ENSMUSG00000090066	-1.38013	5.8672e-05	1110002E22Rik	RIKEN cDNA 1110002E22 gene [Source:MGI Symbol;Acc:MGI:1915066]
ENSMUSG00000028003	2.25886	5.93175e-05	Lrat	lecithin-retinol acyltransferase (phosphatidylcholine-retinol-O-acyltransferase) [Source:MGI Symbol;Acc:MGI:1891259]
ENSMUSG00000036390	1.50601	5.93175e-05	Gadd45a	growth arrest and DNA-damage-inducible 45 alpha [Source:MGI Symbol;Acc:MGI:107799]
ENSMUSG00000015599	-2.70367	6.19304e-05	Ttbk1	tau tubulin kinase 1 [Source:MGI Symbol;Acc:MGI:2147036]
ENSMUSG00000078921	-2.71086	6.32915e-05	Tgtp2	T cell specific GTPase 2 [Source:MGI Symbol;Acc:MGI:3710083]
ENSMUSG00000033355	-1.86392	6.40223e-05	Rtp4	receptor transporter protein 4 [Source:MGI Symbol;Acc:MGI:1915025]
ENSMUSG00000001119	-1.38231	6.40899e-05	Col6a1	collagen, type VI, alpha 1 [Source:MGI Symbol;Acc:MGI:88459]
ENSMUSG00000025511	1.71283	6.68247e-05	Tspan4	tetraspanin 4 [Source:MGI Symbol;Acc:MGI:1928097]
ENSMUSG00000018927	1.51883	6.69269e-05	Ccl6	chemokine (C-C motif) ligand 6 [Source:MGI Symbol;Acc:MGI:98263]
ENSMUSG00000047730	-1.91501	6.69377e-05	Fcgbp	Fc fragment of IgG binding protein [Source:MGI Symbol;Acc:MGI:2444336]
ENSMUSG00000023032	1.92401	6.80171e-05	Slc4a8	solute carrier family 4 (anion exchanger), member 8 [Source:MGI Symbol;Acc:MGI:1928745]
ENSMUSG00000047735	-1.47773	6.94603e-05	Samd9l	sterile alpha motif domain containing 9-like [Source:MGI Symbol;Acc:MGI:1343184]
ENSMUSG00000027408	1.82544	7.06228e-05	Cpxm1	carboxypeptidase X 1 (M14 family) [Source:MGI Symbol;Acc:MGI:1934569]
ENSMUSG00000021573	-1.43638	7.24134e-05	Tppp	tubulin polymerization promoting protein [Source:MGI Symbol;Acc:MGI:1920198]
ENSMUSG00000067653	1.61923	7.42691e-05	Ankrd23	ankyrin repeat domain 23 [Source:MGI Symbol;Acc:MGI:1925571]
ENSMUSG00000020649	1.68981	7.51946e-05	Rrm2	ribonucleotide reductase M2 [Source:MGI Symbol;Acc:MGI:98181]
ENSMUSG00000025813	-1.37671	7.95469e-05	Homer2	homer scaffolding protein 2 [Source:MGI Symbol;Acc:MGI:1347354]
ENSMUSG00000027075	2.13525	8.40247e-05	Slc43a1	solute carrier family 43, member 1 [Source:MGI Symbol;Acc:MGI:1931352]
ENSMUSG00000000416	-1.88018	8.89552e-05	Cttnbp2	cortactin binding protein 2 [Source:MGI Symbol;Acc:MGI:1353467]
ENSMUSG00000052837	1.41389	8.89552e-05	Junb	jun B proto-oncogene [Source:MGI Symbol;Acc:MGI:96647]
ENSMUSG00000027420	2.73787	9.18856e-05	Bfsp1	beaded filament structural protein 1, in lens-CP94 [Source:MGI Symbol;Acc:MGI:101770]
ENSMUSG00000029661	-1.3637	9.18856e-05	Col1a2	collagen, type I, alpha 2 [Source:MGI Symbol;Acc:MGI:88468]
ENSMUSG00000037145	3.04876	9.36516e-05	2210407C18Rik	RIKEN cDNA 2210407C18 gene [Source:MGI Symbol;Acc:MGI:1925604]
ENSMUSG00000052934	1.48882	9.74496e-05	Fbxo31	F-box protein 31 [Source:MGI Symbol;Acc:MGI:1354708]
ENSMUSG00000079451	1.85893	9.74496e-05	Tmprss11g	transmembrane protease, serine 11g [Source:MGI Symbol;Acc:MGI:2444058]
ENSMUSG00000025934	2.18977	0.000104525	Gsta3	glutathione S-transferase, alpha 3 [Source:MGI Symbol;Acc:MGI:95856]
ENSMUSG00000024502	-2.69961	0.000108251	Jakmip2	janus kinase and microtubule interacting protein 2 [Source:MGI Symbol;Acc:MGI:1923467]
ENSMUSG00000079103	-1.53461	0.000111725	Tgm7	transglutaminase 7 [Source:MGI Symbol;Acc:MGI:2151164]
ENSMUSG00000028427	-1.90903	0.00011181	Aqp7	aquaporin 7 [Source:MGI Symbol;Acc:MGI:1314647]
ENSMUSG00000041754	10	0.000113318	Trem3	triggering receptor expressed on myeloid cells 3 [Source:MGI Symbol;Acc:MGI:1930003]
ENSMUSG00000064353	-1.83096	0.000114759	mt-Td	mitochondrially encoded tRNA aspartic acid [Source:MGI Symbol;Acc:MGI:102489]
ENSMUSG00000072680	3.4249	0.000115381	Tmem254c	transmembrane protein 254c [Source:MGI Symbol;Acc:MGI:3711260]
ENSMUSG00000066584	10	0.000116024	Scgb2b27	secretoglobin, family 2B, member 27 [Source:MGI Symbol;Acc:MGI:87863]
ENSMUSG00000031490	1.46653	0.000121205	Eif4ebp1	eukaryotic translation initiation factor 4E binding protein 1 [Source:MGI Symbol;Acc:MGI:103267]
ENSMUSG00000064325	-1.99225	0.000134437	Hhip	Hedgehog-interacting protein [Source:MGI Symbol;Acc:MGI:1341847]
ENSMUSG00000062433	-10	0.000134496	Krtap6-2	keratin associated protein 6-2 [Source:MGI Symbol;Acc:MGI:1330280]
ENSMUSG00000086436	-4.70622	0.000140881	Gm13690	predicted gene 13690 [Source:MGI Symbol;Acc:MGI:3652065]
ENSMUSG00000073409	-2.02323	0.000141198	H2-Q6	histocompatibility 2, Q region locus 6 [Source:MGI Symbol;Acc:MGI:95935]
ENSMUSG00000052749	3.19986	0.000146126	Trim30b	tripartite motif-containing 30B [Source:MGI Symbol;Acc:MGI:4821256]
ENSMUSG00000100865	-1.44132	0.000151311	Gm9320	predicted gene 9320 [Source:MGI Symbol;Acc:MGI:3645000]
ENSMUSG00000060802	-1.29308	0.000152101	B2m	beta-2 microglobulin [Source:MGI Symbol;Acc:MGI:88127]
ENSMUSG00000022636	-1.5088	0.000153765	Alcam	activated leukocyte cell adhesion molecule [Source:MGI Symbol;Acc:MGI:1313266]
ENSMUSG00000082020	-5.62531	0.00015487	Gm14182	predicted gene 14182 [Source:MGI Symbol;Acc:MGI:3650015]
ENSMUSG00000046687	1.65624	0.000163459	Gm5424	predicted gene 5424 [Source:MGI Symbol;Acc:MGI:3643173]
ENSMUSG00000025001	1.80305	0.000167258	Hells	helicase, lymphoid specific [Source:MGI Symbol;Acc:MGI:106209]
ENSMUSG00000097286	-2.07949	0.000168886	Gm26684	predicted gene, 26684 [Source:MGI Symbol;Acc:MGI:5477178]
ENSMUSG00000040253	-1.67681	0.000173257	Gbp7	guanylate binding protein 7 [Source:MGI Symbol;Acc:MGI:2444421]
ENSMUSG00000076617	-1.82002	0.000173257	Ighm	immunoglobulin heavy constant mu [Source:MGI Symbol;Acc:MGI:96448]
ENSMUSG00000039579	-4.08367	0.000182842	Grin3a	glutamate receptor ionotropic, NMDA3A [Source:MGI Symbol;Acc:MGI:1933206]
ENSMUSG00000005355	1.58966	0.000186442	Casp14	caspase 14 [Source:MGI Symbol;Acc:MGI:1335092]
ENSMUSG00000005268	-1.49611	0.00019285	Prlr	prolactin receptor [Source:MGI Symbol;Acc:MGI:97763]
ENSMUSG00000043472	1.43871	0.00019285	Lce3d	late cornified envelope 3D [Source:MGI Symbol;Acc:MGI:3642919]
ENSMUSG00000074928	-10	0.000197644	Krtap14	keratin associated protein 14 [Source:MGI Symbol;Acc:MGI:1346079]
ENSMUSG00000109754	-3.70533	0.000198547	Gm39214	predicted gene, 39214 [Source:MGI Symbol;Acc:MGI:5622099]
ENSMUSG00000046157	-1.34985	0.000203798	Tmem229b	transmembrane protein 229B [Source:MGI Symbol;Acc:MGI:2444389]
ENSMUSG00000028758	3.06428	0.000210396	Kif17	kinesin family member 17 [Source:MGI Symbol;Acc:MGI:1098229]
ENSMUSG00000032348	1.42898	0.000212249	Gsta4	glutathione S-transferase, alpha 4 [Source:MGI Symbol;Acc:MGI:1309515]
ENSMUSG00000029236	-1.44102	0.000214757	Nmu	neuromedin U [Source:MGI Symbol;Acc:MGI:1860476]
ENSMUSG00000030889	-3.24449	0.000223275	Vwa3a	von Willebrand factor A domain containing 3A [Source:MGI Symbol;Acc:MGI:3041229]
ENSMUSG00000026749	1.78391	0.000225703	Nek6	NIMA (never in mitosis gene a)-related expressed kinase 6 [Source:MGI Symbol;Acc:MGI:1891638]
ENSMUSG00000021453	1.35151	0.000231172	Gadd45g	growth arrest and DNA-damage-inducible 45 gamma [Source:MGI Symbol;Acc:MGI:1346325]
ENSMUSG00000026773	1.46055	0.000234847	Pfkfb3	6-phosphofructo-2-kinase/fructose-2,6-biphosphatase 3 [Source:MGI Symbol;Acc:MGI:2181202]
ENSMUSG00000027801	-4.09442	0.000236534	Tm4sf4	transmembrane 4 superfamily member 4 [Source:MGI Symbol;Acc:MGI:2385173]
ENSMUSG00000021765	1.45204	0.000236538	Fst	follistatin [Source:MGI Symbol;Acc:MGI:95586]
ENSMUSG00000068748	1.49187	0.000248438	Ptprz1	protein tyrosine phosphatase, receptor type Z, polypeptide 1 [Source:MGI Symbol;Acc:MGI:97816]
ENSMUSG00000014846	-1.30912	0.000250882	Tppp3	tubulin polymerization-promoting protein family member 3 [Source:MGI Symbol;Acc:MGI:1915221]
ENSMUSG00000115946	5.4504	0.000250882	Mirt2	myocardial infraction associated transcript 2 [Source:MGI Symbol;Acc:MGI:3642813]
ENSMUSG00000022952	1.55731	0.000256399	Runx1	runt related transcription factor 1 [Source:MGI Symbol;Acc:MGI:99852]
ENSMUSG00000032446	5.26795	0.000256399	Eomes	eomesodermin [Source:MGI Symbol;Acc:MGI:1201683]
ENSMUSG00000066842	-1.42724	0.000271811	Hmcn1	hemicentin 1 [Source:MGI Symbol;Acc:MGI:2685047]
ENSMUSG00000028613	1.84312	0.000274882	Lrp8	low density lipoprotein receptor-related protein 8, apolipoprotein e receptor [Source:MGI Symbol;Acc:MGI:1340044]
ENSMUSG00000037035	2.18415	0.000275661	Inhbb	inhibin beta-B [Source:MGI Symbol;Acc:MGI:96571]
ENSMUSG00000020120	1.66516	0.000276048	Plek	pleckstrin [Source:MGI Symbol;Acc:MGI:1860485]
ENSMUSG00000082064	1.93206	0.000280083	Rpl5-ps2	ribisomal protein L5, pseudogene 2 [Source:MGI Symbol;Acc:MGI:3649355]
ENSMUSG00000111713	-3.72188	0.000284381	Gm20234	predicted gene, 20234 [Source:MGI Symbol;Acc:MGI:5012419]
ENSMUSG00000083945	5.41039	0.000287917	Gm15242	predicted gene 15242 [Source:MGI Symbol;Acc:MGI:3705602]
ENSMUSG00000024810	1.33493	0.00031165	Il33	interleukin 33 [Source:MGI Symbol;Acc:MGI:1924375]
ENSMUSG00000043850	-3.34537	0.000329554	Clrn1	clarin 1 [Source:MGI Symbol;Acc:MGI:2388124]
ENSMUSG00000026656	1.45825	0.000335273	Fcgr2b	Fc receptor, IgG, low affinity IIb [Source:MGI Symbol;Acc:MGI:95499]
ENSMUSG00000056716	-2.18898	0.000335273	Gm5420	predicted gene 5420 [Source:MGI Symbol;Acc:MGI:3645721]
ENSMUSG00000074155	-1.67974	0.000337029	Klk5	kallikrein related-peptidase 5 [Source:MGI Symbol;Acc:MGI:1915918]
ENSMUSG00000074445	-1.50978	0.000349342	Sprr2a3	small proline-rich protein 2A3 [Source:MGI Symbol;Acc:MGI:3845028]
ENSMUSG00000051504	-2.91041	0.00036147	Siglech	sialic acid binding Ig-like lectin H [Source:MGI Symbol;Acc:MGI:2443256]
ENSMUSG00000028874	2.31221	0.000379886	Fgr	FGR proto-oncogene, Src family tyrosine kinase [Source:MGI Symbol;Acc:MGI:95527]
ENSMUSG00000112023	1.74649	0.000392747	Lilr4b	leukocyte immunoglobulin-like receptor, subfamily B, member 4B [Source:MGI Symbol;Acc:MGI:102702]
ENSMUSG00000081056	1.90374	0.0004204	Gm13998	predicted gene 13998 [Source:MGI Symbol;Acc:MGI:3651215]
ENSMUSG00000025044	2.16646	0.000430681	Msr1	macrophage scavenger receptor 1 [Source:MGI Symbol;Acc:MGI:98257]
ENSMUSG00000039452	2.19133	0.000430878	Snx22	sorting nexin 22 [Source:MGI Symbol;Acc:MGI:2685966]
ENSMUSG00000022240	-1.94101	0.000434803	Ctnnd2	catenin (cadherin associated protein), delta 2 [Source:MGI Symbol;Acc:MGI:1195966]
ENSMUSG00000056481	-1.36504	0.000440908	Cd248	CD248 antigen, endosialin [Source:MGI Symbol;Acc:MGI:1917695]
ENSMUSG00000051998	-2.58811	0.000443086	Lax1	lymphocyte transmembrane adaptor 1 [Source:MGI Symbol;Acc:MGI:2443362]
ENSMUSG00000102705	3.45173	0.000449979	4632432E15Rik	RIKEN cDNA 4632432E15 gene [Source:MGI Symbol;Acc:MGI:1921296]
ENSMUSG00000044139	-2.12603	0.000485367	Prss53	protease, serine 53 [Source:MGI Symbol;Acc:MGI:2652890]
ENSMUSG00000006522	3.42476	0.000491205	Itih3	inter-alpha trypsin inhibitor, heavy chain 3 [Source:MGI Symbol;Acc:MGI:96620]
ENSMUSG00000022582	10	0.00050057	Ly6g	lymphocyte antigen 6 complex, locus G [Source:MGI Symbol;Acc:MGI:109440]
ENSMUSG00000033777	2.27454	0.000503072	Tlr13	toll-like receptor 13 [Source:MGI Symbol;Acc:MGI:3045213]
ENSMUSG00000063804	10	0.000505424	Lin28b	lin-28 homolog B (C. elegans) [Source:MGI Symbol;Acc:MGI:3584032]
ENSMUSG00000083481	-1.31546	0.000508313	Rps8-ps2	ribosomal protein S8, pseudogene 2 [Source:MGI Symbol;Acc:MGI:3649696]
ENSMUSG00000033213	2.88246	0.000524469	AA467197	expressed sequence AA467197 [Source:MGI Symbol;Acc:MGI:3034182]
ENSMUSG00000039304	-1.68244	0.000536043	Tnfsf10	tumor necrosis factor (ligand) superfamily, member 10 [Source:MGI Symbol;Acc:MGI:107414]
ENSMUSG00000000753	-1.27732	0.000540301	Serpinf1	serine (or cysteine) peptidase inhibitor, clade F, member 1 [Source:MGI Symbol;Acc:MGI:108080]
ENSMUSG00000116972	2.41603	0.000540301	Gm6278	predicted gene 6278 [Source:MGI Symbol;Acc:MGI:3644862]
ENSMUSG00000053025	3.03099	0.000557324	Sv2b	synaptic vesicle glycoprotein 2 b [Source:MGI Symbol;Acc:MGI:1927338]
ENSMUSG00000070574	-2.03645	0.000579064	2310016G11Rik	RIKEN cDNA 2310016G11 gene [Source:MGI Symbol;Acc:MGI:1916828]
ENSMUSG00000034205	-1.38475	0.000587428	Loxl2	lysyl oxidase-like 2 [Source:MGI Symbol;Acc:MGI:2137913]
ENSMUSG00000025196	1.49548	0.00060381	Cpn1	carboxypeptidase N, polypeptide 1 [Source:MGI Symbol;Acc:MGI:2135874]
ENSMUSG00000061048	1.35485	0.000606696	Cdh3	cadherin 3 [Source:MGI Symbol;Acc:MGI:88356]
ENSMUSG00000073940	-1.34933	0.000636049	Hbb-bt	hemoglobin, beta adult t chain [Source:MGI Symbol;Acc:MGI:5474850]
ENSMUSG00000040483	-1.63814	0.000646506	Xaf1	XIAP associated factor 1 [Source:MGI Symbol;Acc:MGI:3772572]
ENSMUSG00000074088	4.07187	0.000646506	Snrnp40	small nuclear ribonucleoprotein 40 (U5) [Source:MGI Symbol;Acc:MGI:1913835]
ENSMUSG00000021922	3.0197	0.000653613	Itih4	inter alpha-trypsin inhibitor, heavy chain 4 [Source:MGI Symbol;Acc:MGI:109536]
ENSMUSG00000012428	1.33386	0.000673127	Steap4	STEAP family member 4 [Source:MGI Symbol;Acc:MGI:1923560]
ENSMUSG00000038725	-2.02346	0.000673127	Pkhd1l1	polycystic kidney and hepatic disease 1-like 1 [Source:MGI Symbol;Acc:MGI:2183153]
ENSMUSG00000040197	3.37433	0.000682301	Cd209e	CD209e antigen [Source:MGI Symbol;Acc:MGI:2157948]
ENSMUSG00000039131	2.08504	0.000694327	Gipc2	GIPC PDZ domain containing family, member 2 [Source:MGI Symbol;Acc:MGI:1889209]
ENSMUSG00000094334	2.2184	0.000695068	Fabp5l2	fatty acid binding protein 5-like 2 [Source:MGI Symbol;Acc:MGI:3644282]
ENSMUSG00000020388	-1.437	0.000706874	Pdlim4	PDZ and LIM domain 4 [Source:MGI Symbol;Acc:MGI:1353470]
ENSMUSG00000117770	-3.13865	0.000709708	Gm50285	predicted gene, 50285 [Source:MGI Symbol;Acc:MGI:6303122]
ENSMUSG00000020256	1.32335	0.000713207	Aldh1l2	aldehyde dehydrogenase 1 family, member L2 [Source:MGI Symbol;Acc:MGI:2444680]
ENSMUSG00000021278	10	0.000713207	Amn	amnionless [Source:MGI Symbol;Acc:MGI:1934943]
ENSMUSG00000025105	1.70849	0.000715712	Bnc1	basonuclin 1 [Source:MGI Symbol;Acc:MGI:1097164]
ENSMUSG00000024411	-1.42358	0.000737982	Aqp4	aquaporin 4 [Source:MGI Symbol;Acc:MGI:107387]
ENSMUSG00000062480	3.50761	0.000751364	Acat3	acetyl-Coenzyme A acetyltransferase 3 [Source:MGI Symbol;Acc:MGI:109182]
ENSMUSG00000032271	1.98403	0.000753151	Nnmt	nicotinamide N-methyltransferase [Source:MGI Symbol;Acc:MGI:1099443]
ENSMUSG00000028587	2.71107	0.000774814	Orc1	origin recognition complex, subunit 1 [Source:MGI Symbol;Acc:MGI:1328337]
ENSMUSG00000029361	-1.20442	0.00077877	Nos1	nitric oxide synthase 1, neuronal [Source:MGI Symbol;Acc:MGI:97360]
ENSMUSG00000101086	-2.36317	0.000785833	Gm28651	predicted gene 28651 [Source:MGI Symbol;Acc:MGI:5579357]
ENSMUSG00000022534	2.92867	0.0007905	Mefv	Mediterranean fever [Source:MGI Symbol;Acc:MGI:1859396]
ENSMUSG00000053175	1.51023	0.000802437	Bcl3	B cell leukemia/lymphoma 3 [Source:MGI Symbol;Acc:MGI:88140]
ENSMUSG00000063234	4.04717	0.000803226	Gpr84	G protein-coupled receptor 84 [Source:MGI Symbol;Acc:MGI:1934129]
ENSMUSG00000020674	-1.27442	0.000805142	Pxdn	peroxidasin [Source:MGI Symbol;Acc:MGI:1916925]
ENSMUSG00000060550	-1.91592	0.000808935	H2-Q7	histocompatibility 2, Q region locus 7 [Source:MGI Symbol;Acc:MGI:95936]
ENSMUSG00000032908	1.30586	0.000809062	Sgpp2	sphingosine-1-phosphate phosphotase 2 [Source:MGI Symbol;Acc:MGI:3589109]
ENSMUSG00000020638	-1.92685	0.000870495	Cmpk2	cytidine monophosphate (UMP-CMP) kinase 2, mitochondrial [Source:MGI Symbol;Acc:MGI:99830]
ENSMUSG00000024517	-5.36454	0.000870495	Grp	gastrin releasing peptide [Source:MGI Symbol;Acc:MGI:95833]
ENSMUSG00000030089	-1.27268	0.000881438	Slc41a3	solute carrier family 41, member 3 [Source:MGI Symbol;Acc:MGI:1918949]
ENSMUSG00000011179	1.28787	0.000887695	Odc1	ornithine decarboxylase, structural 1 [Source:MGI Symbol;Acc:MGI:97402]
ENSMUSG00000029304	1.69437	0.000887695	Spp1	secreted phosphoprotein 1 [Source:MGI Symbol;Acc:MGI:98389]
ENSMUSG00000025473	1.48788	0.000932185	Adam8	a disintegrin and metallopeptidase domain 8 [Source:MGI Symbol;Acc:MGI:107825]
ENSMUSG00000025213	-1.67392	0.00093815	Kazald1	Kazal-type serine peptidase inhibitor domain 1 [Source:MGI Symbol;Acc:MGI:2147606]
ENSMUSG00000026574	-1.20775	0.00094514	Dpt	dermatopontin [Source:MGI Symbol;Acc:MGI:1928392]
ENSMUSG00000051748	3.60738	0.000952772	Wfdc21	WAP four-disulfide core domain 21 [Source:MGI Symbol;Acc:MGI:1913357]
ENSMUSG00000035861	1.29116	0.000953719	Tmprss11b	transmembrane protease, serine 11B [Source:MGI Symbol;Acc:MGI:2442893]
ENSMUSG00000113459	-10	0.000965152	Gm30655	predicted gene, 30655 [Source:MGI Symbol;Acc:MGI:5589814]
ENSMUSG00000062960	-1.21524	0.00105563	Kdr	kinase insert domain protein receptor [Source:MGI Symbol;Acc:MGI:96683]
ENSMUSG00000002831	1.32662	0.00108858	Plin4	perilipin 4 [Source:MGI Symbol;Acc:MGI:1929709]
ENSMUSG00000026896	-1.31711	0.00109408	Ifih1	interferon induced with helicase C domain 1 [Source:MGI Symbol;Acc:MGI:1918836]
ENSMUSG00000044243	-2.647	0.00113985	Bhlha9	basic helix-loop-helix family, member a9 [Source:MGI Symbol;Acc:MGI:2444198]
ENSMUSG00000095028	3.79971	0.00115235	Sirpb1b	signal-regulatory protein beta 1B [Source:MGI Symbol;Acc:MGI:3779828]
ENSMUSG00000005360	1.63397	0.00115668	Slc1a3	solute carrier family 1 (glial high affinity glutamate transporter), member 3 [Source:MGI Symbol;Acc:MGI:99917]
ENSMUSG00000026880	1.26861	0.00115668	Stom	stomatin [Source:MGI Symbol;Acc:MGI:95403]
ENSMUSG00000039519	1.82681	0.00115856	Cyp7b1	cytochrome P450, family 7, subfamily b, polypeptide 1 [Source:MGI Symbol;Acc:MGI:104978]
ENSMUSG00000037621	1.78925	0.00117325	Atoh8	atonal bHLH transcription factor 8 [Source:MGI Symbol;Acc:MGI:1918343]
ENSMUSG00000037206	-1.2976	0.0011738	Islr	immunoglobulin superfamily containing leucine-rich repeat [Source:MGI Symbol;Acc:MGI:1349645]
ENSMUSG00000035673	1.26885	0.00117774	Sbno2	strawberry notch 2 [Source:MGI Symbol;Acc:MGI:2448490]
ENSMUSG00000067001	-1.3831	0.00123097	Serpinb7	serine (or cysteine) peptidase inhibitor, clade B, member 7 [Source:MGI Symbol;Acc:MGI:2151053]
ENSMUSG00000095869	4.00168	0.00123097	Ppp1r2-ps6	protein phosphatase 1, regulatory (inhibitor) subunit 2, pseudogene 6 [Source:MGI Symbol;Acc:MGI:3644697]
ENSMUSG00000022673	1.36888	0.00126961	Mcm4	minichromosome maintenance complex component 4 [Source:MGI Symbol;Acc:MGI:103199]
ENSMUSG00000024440	-1.74242	0.00127909	Pcdh12	protocadherin 12 [Source:MGI Symbol;Acc:MGI:1855700]
ENSMUSG00000032350	1.25787	0.00131665	Gclc	glutamate-cysteine ligase, catalytic subunit [Source:MGI Symbol;Acc:MGI:104990]
ENSMUSG00000091712	-1.24716	0.00139419	Sec14l5	SEC14-like lipid binding 5 [Source:MGI Symbol;Acc:MGI:3616084]
ENSMUSG00000060311	-2.84703	0.00141852	Mucl1	mucin-like 1 [Source:MGI Symbol;Acc:MGI:98393]
ENSMUSG00000113059	-1.45645	0.0014485	Gm46344	predicted gene, 46344 [Source:MGI Symbol;Acc:MGI:5825981]
ENSMUSG00000071984	-1.18082	0.00145416	Fndc1	fibronectin type III domain containing 1 [Source:MGI Symbol;Acc:MGI:1915905]
ENSMUSG00000092572	-1.22611	0.00146685	Serpinb10	serine (or cysteine) peptidase inhibitor, clade B (ovalbumin), member 10 [Source:MGI Symbol;Acc:MGI:2138648]
ENSMUSG00000035606	-1.1788	0.00154865	Ky	kyphoscoliosis peptidase [Source:MGI Symbol;Acc:MGI:96709]
ENSMUSG00000032548	1.27961	0.0016664	Slco2a1	solute carrier organic anion transporter family, member 2a1 [Source:MGI Symbol;Acc:MGI:1346021]
ENSMUSG00000026390	10	0.00171392	Marco	macrophage receptor with collagenous structure [Source:MGI Symbol;Acc:MGI:1309998]
ENSMUSG00000032181	-1.79926	0.00178867	Scg3	secretogranin III [Source:MGI Symbol;Acc:MGI:103032]
ENSMUSG00000060678	2.53479	0.00186273	Hist1h4c	histone cluster 1, H4c [Source:MGI Symbol;Acc:MGI:2448421]
ENSMUSG00000081520	2.67042	0.00187247	Gm16200	predicted gene 16200 [Source:MGI Symbol;Acc:MGI:3801928]
ENSMUSG00000033854	-2.92136	0.00189629	Kcnk10	potassium channel, subfamily K, member 10 [Source:MGI Symbol;Acc:MGI:1919508]
ENSMUSG00000111709	1.54029	0.00197527	Gm3776	predicted gene 3776 [Source:MGI Symbol;Acc:MGI:3826440]
ENSMUSG00000021701	1.23781	0.00201683	Plk2	polo like kinase 2 [Source:MGI Symbol;Acc:MGI:1099790]
ENSMUSG00000089728	3.06997	0.00202478	Clec2f	C-type lectin domain family 2, member f [Source:MGI Symbol;Acc:MGI:3522133]
ENSMUSG00000023968	-1.71409	0.00202745	Crip3	cysteine-rich protein 3 [Source:MGI Symbol;Acc:MGI:2152434]
ENSMUSG00000050896	3.41969	0.00204655	Rtn4rl2	reticulon 4 receptor-like 2 [Source:MGI Symbol;Acc:MGI:2669796]
ENSMUSG00000032744	-1.40124	0.00207909	Heyl	hairy/enhancer-of-split related with YRPW motif-like [Source:MGI Symbol;Acc:MGI:1860511]
ENSMUSG00000005686	1.27477	0.00214783	Ampd3	adenosine monophosphate deaminase 3 [Source:MGI Symbol;Acc:MGI:1096344]
ENSMUSG00000104554	3.65481	0.00216576	Gm4610	predicted gene 4610 [Source:MGI Symbol;Acc:MGI:3782793]
ENSMUSG00000046259	1.38827	0.00216743	Sprr2h	small proline-rich protein 2H [Source:MGI Symbol;Acc:MGI:1330343]
ENSMUSG00000078853	-1.35553	0.00216743	Igtp	interferon gamma induced GTPase [Source:MGI Symbol;Acc:MGI:107729]
ENSMUSG00000068120	4.88173	0.00220017	Gm10231	predicted pseudogene 10231 [Source:MGI Symbol;Acc:MGI:3704468]
ENSMUSG00000061878	1.71885	0.00227553	Sphk1	sphingosine kinase 1 [Source:MGI Symbol;Acc:MGI:1316649]
ENSMUSG00000030666	-2.3418	0.00230834	Calcb	calcitonin-related polypeptide, beta [Source:MGI Symbol;Acc:MGI:2151254]
ENSMUSG00000063903	2.76633	0.00232129	Klk1	kallikrein 1 [Source:MGI Symbol;Acc:MGI:102850]
ENSMUSG00000038599	-2.44507	0.00234711	Capn8	calpain 8 [Source:MGI Symbol;Acc:MGI:2181366]
ENSMUSG00000025481	1.5128	0.00235106	Urah	urate (5-hydroxyiso-) hydrolase [Source:MGI Symbol;Acc:MGI:1916142]
ENSMUSG00000056394	1.40669	0.00236537	Lig1	ligase I, DNA, ATP-dependent [Source:MGI Symbol;Acc:MGI:101789]
ENSMUSG00000004988	-2.19157	0.00242974	Fxyd4	FXYD domain-containing ion transport regulator 4 [Source:MGI Symbol;Acc:MGI:1889005]
ENSMUSG00000002870	1.39243	0.00250483	Mcm2	minichromosome maintenance complex component 2 [Source:MGI Symbol;Acc:MGI:105380]
ENSMUSG00000026479	1.19579	0.00250693	Lamc2	laminin, gamma 2 [Source:MGI Symbol;Acc:MGI:99913]
ENSMUSG00000071713	1.35619	0.00251764	Csf2rb	colony stimulating factor 2 receptor, beta, low-affinity (granulocyte-macrophage) [Source:MGI Symbol;Acc:MGI:1339759]
ENSMUSG00000020407	1.57507	0.00256807	Upp1	uridine phosphorylase 1 [Source:MGI Symbol;Acc:MGI:1097668]
ENSMUSG00000026068	2.26577	0.00259468	Il18rap	interleukin 18 receptor accessory protein [Source:MGI Symbol;Acc:MGI:1338888]
ENSMUSG00000015962	-2.12279	0.00262706	1700016C15Rik	RIKEN cDNA 1700016C15 gene [Source:MGI Symbol;Acc:MGI:1916678]
ENSMUSG00000026355	1.31257	0.00266923	Mcm6	minichromosome maintenance complex component 6 [Source:MGI Symbol;Acc:MGI:1298227]
ENSMUSG00000006585	1.73457	0.00270619	Cdt1	chromatin licensing and DNA replication factor 1 [Source:MGI Symbol;Acc:MGI:1914427]
ENSMUSG00000056004	-2.33079	0.00272958	9330182L06Rik	RIKEN cDNA 9330182L06 gene [Source:MGI Symbol;Acc:MGI:2443264]
ENSMUSG00000034159	-1.17547	0.00276497	Mab21l4	mab-21-like 4 [Source:MGI Symbol;Acc:MGI:1919124]
ENSMUSG00000097636	2.43627	0.00279978	Mirt1	myocardial infarction associated transcript 1 [Source:MGI Symbol;Acc:MGI:1922001]
ENSMUSG00000095241	1.71086	0.00282269	Gm5478	predicted pseudogene 5478 [Source:MGI Symbol;Acc:MGI:3646318]
ENSMUSG00000027908	-1.62643	0.00287835	Tchhl1	trichohyalin-like 1 [Source:MGI Symbol;Acc:MGI:1918575]
ENSMUSG00000110631	1.57907	0.00287835	Gm42047	predicted gene, 42047 [Source:MGI Symbol;Acc:MGI:5624932]
ENSMUSG00000019122	1.32066	0.00288416	Ccl9	chemokine (C-C motif) ligand 9 [Source:MGI Symbol;Acc:MGI:104533]
ENSMUSG00000031274	-1.29284	0.00288416	Col4a5	collagen, type IV, alpha 5 [Source:MGI Symbol;Acc:MGI:88456]
ENSMUSG00000028645	1.18799	0.0029191	Slc2a1	solute carrier family 2 (facilitated glucose transporter), member 1 [Source:MGI Symbol;Acc:MGI:95755]
ENSMUSG00000090186	-2.69491	0.00293075	Gm7592	predicted gene 7592 [Source:MGI Symbol;Acc:MGI:3644077]
ENSMUSG00000028989	1.67706	0.002962	Angptl7	angiopoietin-like 7 [Source:MGI Symbol;Acc:MGI:3605801]
ENSMUSG00000039997	-1.41757	0.002962	Ifi203	interferon activated gene 203 [Source:MGI Symbol;Acc:MGI:96428]
ENSMUSG00000043091	1.20782	0.002962	Tuba1c	tubulin, alpha 1C [Source:MGI Symbol;Acc:MGI:1095409]
ENSMUSG00000043740	3.33033	0.0029814	B430306N03Rik	RIKEN cDNA B430306N03 gene [Source:MGI Symbol;Acc:MGI:2443478]
ENSMUSG00000053398	1.18267	0.00304555	Phgdh	3-phosphoglycerate dehydrogenase [Source:MGI Symbol;Acc:MGI:1355330]
ENSMUSG00000027533	1.82945	0.00306799	Fabp5	fatty acid binding protein 5, epidermal [Source:MGI Symbol;Acc:MGI:101790]
ENSMUSG00000117864	2.33909	0.00310814	Gm19500	predicted gene, 19500 [Source:MGI Symbol;Acc:MGI:5011685]
ENSMUSG00000032936	-2.36767	0.00312128	Camkv	CaM kinase-like vesicle-associated [Source:MGI Symbol;Acc:MGI:2384296]
ENSMUSG00000059089	3.10396	0.00315676	Fcgr4	Fc receptor, IgG, low affinity IV [Source:MGI Symbol;Acc:MGI:2179523]
ENSMUSG00000060445	3.87053	0.00315676	Sycp2	synaptonemal complex protein 2 [Source:MGI Symbol;Acc:MGI:1933281]
ENSMUSG00000090121	-2.91477	0.00316153	Abhd12b	abhydrolase domain containing 12B [Source:MGI Symbol;Acc:MGI:2685650]
ENSMUSG00000022146	1.24902	0.00321357	Osmr	oncostatin M receptor [Source:MGI Symbol;Acc:MGI:1330819]
ENSMUSG00000079105	-1.93755	0.00325826	C7	complement component 7 [Source:MGI Symbol;Acc:MGI:88235]
ENSMUSG00000054203	1.55324	0.00330194	Ifi205	interferon activated gene 205 [Source:MGI Symbol;Acc:MGI:101847]
ENSMUSG00000044359	-1.45637	0.0033084	P2ry4	pyrimidinergic receptor P2Y, G-protein coupled, 4 [Source:MGI Symbol;Acc:MGI:1926594]
ENSMUSG00000023150	-1.23589	0.00333024	Ivns1abp	influenza virus NS1A binding protein [Source:MGI Symbol;Acc:MGI:2152389]
ENSMUSG00000031827	1.18217	0.0033305	Cotl1	coactosin-like 1 (Dictyostelium) [Source:MGI Symbol;Acc:MGI:1919292]
ENSMUSG00000066687	1.22802	0.0033305	Zbtb16	zinc finger and BTB domain containing 16 [Source:MGI Symbol;Acc:MGI:103222]
ENSMUSG00000030433	-1.09999	0.00339278	Sbk2	SH3-binding domain kinase family, member 2 [Source:MGI Symbol;Acc:MGI:2685925]
ENSMUSG00000003541	1.20881	0.00343086	Ier3	immediate early response 3 [Source:MGI Symbol;Acc:MGI:104814]
ENSMUSG00000032278	-1.20332	0.00354124	Paqr5	progestin and adipoQ receptor family member V [Source:MGI Symbol;Acc:MGI:1921340]
ENSMUSG00000113586	-3.01326	0.00356447	Gm48606	predicted gene, 48606 [Source:MGI Symbol;Acc:MGI:6098190]
ENSMUSG00000032226	3.77962	0.00357017	Gcnt3	glucosaminyl (N-acetyl) transferase 3, mucin type [Source:MGI Symbol;Acc:MGI:1919327]
ENSMUSG00000078780	10	0.00366506	Gm5150	predicted gene 5150 [Source:MGI Symbol;Acc:MGI:3779469]
ENSMUSG00000056380	-2.35834	0.00373824	Gpr50	G-protein-coupled receptor 50 [Source:MGI Symbol;Acc:MGI:1333877]
ENSMUSG00000026676	-1.15452	0.00379036	Ccdc3	coiled-coil domain containing 3 [Source:MGI Symbol;Acc:MGI:1921436]
ENSMUSG00000041482	-1.7547	0.00379036	Piezo2	piezo-type mechanosensitive ion channel component 2 [Source:MGI Symbol;Acc:MGI:1918781]
ENSMUSG00000085020	-2.29087	0.00381794	2310081O03Rik	RIKEN cDNA 2310081O03 gene [Source:MGI Symbol;Acc:MGI:1919656]
ENSMUSG00000059714	1.16606	0.0038502	Flot1	flotillin 1 [Source:MGI Symbol;Acc:MGI:1100500]
ENSMUSG00000028378	1.17711	0.00390229	Ptgr1	prostaglandin reductase 1 [Source:MGI Symbol;Acc:MGI:1914353]
ENSMUSG00000055413	-2.23443	0.00392377	H2-Q5	histocompatibility 2, Q region locus 5 [Source:MGI Symbol;Acc:MGI:95934]
ENSMUSG00000059832	-1.17377	0.00394981	Kprp	keratinocyte expressed, proline-rich [Source:MGI Symbol;Acc:MGI:1920981]
ENSMUSG00000038855	-1.12269	0.00395171	Itpkb	inositol 1,4,5-trisphosphate 3-kinase B [Source:MGI Symbol;Acc:MGI:109235]
ENSMUSG00000022665	-1.12378	0.0040444	Ccdc80	coiled-coil domain containing 80 [Source:MGI Symbol;Acc:MGI:1915146]
ENSMUSG00000064368	-1.14572	0.00411974	mt-Nd6	mitochondrially encoded NADH dehydrogenase 6 [Source:MGI Symbol;Acc:MGI:102495]
ENSMUSG00000087659	3.38369	0.00414495	Gm12606	predicted gene 12606 [Source:MGI Symbol;Acc:MGI:3649222]
ENSMUSG00000028358	-1.6606	0.00414669	Zfp618	zinc finger protein 618 [Source:MGI Symbol;Acc:MGI:1919950]
ENSMUSG00000071036	4.77732	0.00416453	Gm10309	predicted gene 10309 [Source:MGI Symbol;Acc:MGI:3641941]
ENSMUSG00000037263	2.30977	0.00419596	Aldh3b3	aldehyde dehydrogenase 3 family, member B3 [Source:MGI Symbol;Acc:MGI:1920708]
ENSMUSG00000058260	-1.12643	0.00421357	Serpina9	serine (or cysteine) peptidase inhibitor, clade A (alpha-1 antiproteinase, antitrypsin), member 9 [Source:MGI Symbol;Acc:MGI:1919157]
ENSMUSG00000034295	-1.11461	0.00430596	Fhod3	formin homology 2 domain containing 3 [Source:MGI Symbol;Acc:MGI:1925847]
ENSMUSG00000081895	1.67709	0.00437649	Rpl17-ps10	ribosomal protein L17, pseudogene 10 [Source:MGI Symbol;Acc:MGI:3642871]
ENSMUSG00000038624	-2.66831	0.00438348	Nepn	nephrocan [Source:MGI Symbol;Acc:MGI:1913900]
ENSMUSG00000085569	10	0.00440094	Gm12602	predicted gene 12602 [Source:MGI Symbol;Acc:MGI:3651757]
ENSMUSG00000039911	1.18531	0.00444048	Spsb1	splA/ryanodine receptor domain and SOCS box containing 1 [Source:MGI Symbol;Acc:MGI:1921896]
ENSMUSG00000030790	1.47678	0.00457761	Adm	adrenomedullin [Source:MGI Symbol;Acc:MGI:108058]
ENSMUSG00000059970	1.2435	0.00457761	Hspa2	heat shock protein 2 [Source:MGI Symbol;Acc:MGI:96243]
ENSMUSG00000023041	1.94104	0.00464844	Krt6b	keratin 6B [Source:MGI Symbol;Acc:MGI:1333768]
ENSMUSG00000040170	-1.13435	0.00476144	Fmo2	flavin containing monooxygenase 2 [Source:MGI Symbol;Acc:MGI:1916776]
ENSMUSG00000031293	-3.7444	0.00483039	Rs1	retinoschisis (X-linked, juvenile) 1 (human) [Source:MGI Symbol;Acc:MGI:1336189]
ENSMUSG00000036123	-1.36562	0.00486385	Slc9a3	solute carrier family 9 (sodium/hydrogen exchanger), member 3 [Source:MGI Symbol;Acc:MGI:105064]
ENSMUSG00000029675	-1.09657	0.00510957	Eln	elastin [Source:MGI Symbol;Acc:MGI:95317]
ENSMUSG00000042359	-1.49729	0.00524155	Osbpl6	oxysterol binding protein-like 6 [Source:MGI Symbol;Acc:MGI:2139014]
ENSMUSG00000037572	1.51123	0.00525876	Wdhd1	WD repeat and HMG-box DNA binding protein 1 [Source:MGI Symbol;Acc:MGI:2443514]
ENSMUSG00000033849	-1.46492	0.00529131	B3galt2	UDP-Gal:betaGlcNAc beta 1,3-galactosyltransferase, polypeptide 2 [Source:MGI Symbol;Acc:MGI:1349461]
ENSMUSG00000037405	1.21587	0.0053276	Icam1	intercellular adhesion molecule 1 [Source:MGI Symbol;Acc:MGI:96392]
ENSMUSG00000110386	1.87523	0.0053276	Gm42031	predicted gene, 42031 [Source:MGI Symbol;Acc:MGI:5624916]
ENSMUSG00000045954	-1.11652	0.00532835	Cavin2	caveolae associated 2 [Source:MGI Symbol;Acc:MGI:99513]
ENSMUSG00000079419	1.71698	0.00535619	Ms4a6c	membrane-spanning 4-domains, subfamily A, member 6C [Source:MGI Symbol;Acc:MGI:2385644]
ENSMUSG00000058669	10	0.00539767	Nkx2-9	NK2 homeobox 9 [Source:MGI Symbol;Acc:MGI:1270158]
ENSMUSG00000049511	2.58078	0.00543966	Htr1b	5-hydroxytryptamine (serotonin) receptor 1B [Source:MGI Symbol;Acc:MGI:96274]
ENSMUSG00000087242	2.80611	0.00549942	C78197	expressed sequence C78197 [Source:MGI Symbol;Acc:MGI:2144636]
ENSMUSG00000081212	-10	0.00557289	Gm6964	predicted gene 6964 [Source:MGI Symbol;Acc:MGI:3644958]
ENSMUSG00000090799	-1.06383	0.00560773	Klhl33	kelch-like 33 [Source:MGI Symbol;Acc:MGI:3644593]
ENSMUSG00000059108	2.46161	0.00562153	Ifitm6	interferon induced transmembrane protein 6 [Source:MGI Symbol;Acc:MGI:2686976]
ENSMUSG00000078263	-4.97826	0.00563645	Gm14188	predicted gene 14188 [Source:MGI Symbol;Acc:MGI:3651817]
ENSMUSG00000010095	1.11624	0.00581687	Slc3a2	solute carrier family 3 (activators of dibasic and neutral amino acid transport), member 2 [Source:MGI Symbol;Acc:MGI:96955]
ENSMUSG00000052212	3.32056	0.00591775	Cd177	CD177 antigen [Source:MGI Symbol;Acc:MGI:1916141]
ENSMUSG00000004105	-1.08523	0.00596987	Angptl2	angiopoietin-like 2 [Source:MGI Symbol;Acc:MGI:1347002]
ENSMUSG00000048636	4.02713	0.00598706	A730049H05Rik	RIKEN cDNA A730049H05 gene [Source:MGI Symbol;Acc:MGI:1921766]
ENSMUSG00000070880	4.77795	0.00604977	Gad1	glutamate decarboxylase 1 [Source:MGI Symbol;Acc:MGI:95632]
ENSMUSG00000019990	-1.09388	0.0060733	Pde7b	phosphodiesterase 7B [Source:MGI Symbol;Acc:MGI:1352752]
ENSMUSG00000024401	2.47047	0.00607862	Tnf	tumor necrosis factor [Source:MGI Symbol;Acc:MGI:104798]
ENSMUSG00000116872	4.60379	0.00614173	Gm6815	predicted gene 6815 [Source:MGI Symbol;Acc:MGI:3648348]
ENSMUSG00000009292	2.59339	0.00618712	Trpm2	transient receptor potential cation channel, subfamily M, member 2 [Source:MGI Symbol;Acc:MGI:1351901]
ENSMUSG00000026888	-1.0743	0.00623148	Grb14	growth factor receptor bound protein 14 [Source:MGI Symbol;Acc:MGI:1355324]
ENSMUSG00000029019	3.0133	0.00623575	Nppb	natriuretic peptide type B [Source:MGI Symbol;Acc:MGI:97368]
ENSMUSG00000048126	-1.08842	0.00623575	Col6a3	collagen, type VI, alpha 3 [Source:MGI Symbol;Acc:MGI:88461]
ENSMUSG00000058794	2.96884	0.00623575	Nfe2	nuclear factor, erythroid derived 2 [Source:MGI Symbol;Acc:MGI:97308]
ENSMUSG00000073490	1.37656	0.00639151	Ifi207	interferon activated gene 207 [Source:MGI Symbol;Acc:MGI:2138302]
ENSMUSG00000035456	-1.91631	0.0065928	Prdm8	PR domain containing 8 [Source:MGI Symbol;Acc:MGI:1924880]
ENSMUSG00000056457	10	0.0066289	Prl2c3	prolactin family 2, subfamily c, member 3 [Source:MGI Symbol;Acc:MGI:1341833]
ENSMUSG00000040264	-3.7301	0.00666758	Gbp2b	guanylate binding protein 2b [Source:MGI Symbol;Acc:MGI:95666]
ENSMUSG00000106373	-3.59448	0.00668927	Gm6522	predicted gene 6522 [Source:MGI Symbol;Acc:MGI:3648401]
ENSMUSG00000085340	10	0.00669963	Gm16335	predicted gene 16335 [Source:MGI Symbol;Acc:MGI:3840152]
ENSMUSG00000028539	2.08693	0.00678004	Artn	artemin [Source:MGI Symbol;Acc:MGI:1333791]
ENSMUSG00000023809	-1.05224	0.00686242	Rps6ka2	ribosomal protein S6 kinase, polypeptide 2 [Source:MGI Symbol;Acc:MGI:1342290]
ENSMUSG00000046818	-1.08675	0.0068671	Ddit4l	DNA-damage-inducible transcript 4-like [Source:MGI Symbol;Acc:MGI:1920534]
ENSMUSG00000000204	1.84445	0.00690976	Slfn4	schlafen 4 [Source:MGI Symbol;Acc:MGI:1329010]
ENSMUSG00000094344	1.61176	0.00709556	Gm11942	predicted gene 11942 [Source:MGI Symbol;Acc:MGI:3650608]
ENSMUSG00000054855	1.87675	0.00732603	Rnd1	Rho family GTPase 1 [Source:MGI Symbol;Acc:MGI:2444878]
ENSMUSG00000060459	2.06423	0.00733227	Kng2	kininogen 2 [Source:MGI Symbol;Acc:MGI:3027157]
ENSMUSG00000066975	-1.98903	0.00752798	Cryba4	crystallin, beta A4 [Source:MGI Symbol;Acc:MGI:102716]
ENSMUSG00000079434	-1.50429	0.00752798	Neu2	neuraminidase 2 [Source:MGI Symbol;Acc:MGI:1344417]
ENSMUSG00000021953	1.27863	0.00753273	Tdh	L-threonine dehydrogenase [Source:MGI Symbol;Acc:MGI:1926231]
ENSMUSG00000017639	-1.4144	0.00761751	Rab11fip4	RAB11 family interacting protein 4 (class II) [Source:MGI Symbol;Acc:MGI:2442920]
ENSMUSG00000030413	2.34599	0.00761751	Pglyrp1	peptidoglycan recognition protein 1 [Source:MGI Symbol;Acc:MGI:1345092]
ENSMUSG00000022595	-1.87766	0.00775632	Lypd2	Ly6/Plaur domain containing 2 [Source:MGI Symbol;Acc:MGI:1915561]
ENSMUSG00000029563	-1.29533	0.0078151	Foxp2	forkhead box P2 [Source:MGI Symbol;Acc:MGI:2148705]
ENSMUSG00000094733	10	0.00801556	Csta3	cystatin A family member 3 [Source:MGI Symbol;Acc:MGI:3644688]
ENSMUSG00000028047	-1.17478	0.00815239	Thbs3	thrombospondin 3 [Source:MGI Symbol;Acc:MGI:98739]
ENSMUSG00000042268	-1.08499	0.00826244	Slc26a9	solute carrier family 26, member 9 [Source:MGI Symbol;Acc:MGI:2444594]
ENSMUSG00000030116	-1.11866	0.0083864	Mfap5	microfibrillar associated protein 5 [Source:MGI Symbol;Acc:MGI:1354387]
ENSMUSG00000058368	-10	0.00844986	Krtap21-1	keratin associated protein 21-1 [Source:MGI Symbol;Acc:MGI:2157767]
ENSMUSG00000102918	1.14976	0.00844986	Pcdhgc3	protocadherin gamma subfamily C, 3 [Source:MGI Symbol;Acc:MGI:1935201]
ENSMUSG00000049404	-1.34995	0.00850106	Rarres1	retinoic acid receptor responder (tazarotene induced) 1 [Source:MGI Symbol;Acc:MGI:1924461]
ENSMUSG00000069763	1.18233	0.00861162	Tmem100	transmembrane protein 100 [Source:MGI Symbol;Acc:MGI:1915138]
ENSMUSG00000096727	-1.46128	0.00866388	Psmb9	proteasome (prosome, macropain) subunit, beta type 9 (large multifunctional peptidase 2) [Source:MGI Symbol;Acc:MGI:1346526]
ENSMUSG00000061144	2.52963	0.00873498	Spink12	serine peptidase inhibitor, Kazal type 12 [Source:MGI Symbol;Acc:MGI:1925492]
ENSMUSG00000026669	1.7951	0.00878084	Mcm10	minichromosome maintenance 10 replication initiation factor [Source:MGI Symbol;Acc:MGI:1917274]
ENSMUSG00000032177	-1.09222	0.00878084	Pde4a	phosphodiesterase 4A, cAMP specific [Source:MGI Symbol;Acc:MGI:99558]
ENSMUSG00000118291	3.28633	0.00878084	Csf1r-ps	colony stimulating factor 1 receptor (granulocyte), pseudogene [Source:MGI Symbol;Acc:MGI:1339756]
ENSMUSG00000047592	2.07656	0.0088324	Nxpe5	neurexophilin and PC-esterase domain family, member 5 [Source:MGI Symbol;Acc:MGI:3584036]
ENSMUSG00000063388	-1.8895	0.00894043	BC023105	cDNA sequence BC023105 [Source:MGI Symbol;Acc:MGI:2384767]
ENSMUSG00000020185	1.62642	0.00896389	E2f7	E2F transcription factor 7 [Source:MGI Symbol;Acc:MGI:1289147]
ENSMUSG00000031125	-3.10395	0.00898008	3830403N18Rik	RIKEN cDNA 3830403N18 gene [Source:MGI Symbol;Acc:MGI:1917941]
ENSMUSG00000056144	-1.6129	0.00901912	Trim34a	tripartite motif-containing 34A [Source:MGI Symbol;Acc:MGI:2137359]
ENSMUSG00000042793	-1.38755	0.00903944	Lgr6	leucine-rich repeat-containing G protein-coupled receptor 6 [Source:MGI Symbol;Acc:MGI:2441805]
ENSMUSG00000049313	-1.04513	0.00903944	Sorl1	sortilin-related receptor, LDLR class A repeats-containing [Source:MGI Symbol;Acc:MGI:1202296]
ENSMUSG00000073418	1.13991	0.00908243	C4b	complement component 4B (Chido blood group) [Source:MGI Symbol;Acc:MGI:88228]
ENSMUSG00000048142	1.28815	0.00918034	Nat8l	N-acetyltransferase 8-like [Source:MGI Symbol;Acc:MGI:2447776]
ENSMUSG00000028532	-1.18962	0.0092295	Cachd1	cache domain containing 1 [Source:MGI Symbol;Acc:MGI:2444177]
ENSMUSG00000061099	2.28328	0.00926303	Gapdhs	glyceraldehyde-3-phosphate dehydrogenase, spermatogenic [Source:MGI Symbol;Acc:MGI:95653]
ENSMUSG00000031169	-1.05375	0.00934293	Porcn	porcupine O-acyltransferase [Source:MGI Symbol;Acc:MGI:1890212]
ENSMUSG00000025969	-1.04942	0.00938356	Nrp2	neuropilin 2 [Source:MGI Symbol;Acc:MGI:1100492]
ENSMUSG00000027419	-1.95682	0.00938356	Pcsk2	proprotein convertase subtilisin/kexin type 2 [Source:MGI Symbol;Acc:MGI:97512]
ENSMUSG00000052085	-1.08583	0.00938356	Dock8	dedicator of cytokinesis 8 [Source:MGI Symbol;Acc:MGI:1921396]
ENSMUSG00000000402	-1.20333	0.00939754	Egfl6	EGF-like-domain, multiple 6 [Source:MGI Symbol;Acc:MGI:1858599]
ENSMUSG00000074272	1.24179	0.00959359	Ceacam1	carcinoembryonic antigen-related cell adhesion molecule 1 [Source:MGI Symbol;Acc:MGI:1347245]
ENSMUSG00000019139	1.26093	0.00972133	Isyna1	myo-inositol 1-phosphate synthase A1 [Source:MGI Symbol;Acc:MGI:1919030]
ENSMUSG00000039676	-2.06403	0.00993265	Capsl	calcyphosine-like [Source:MGI Symbol;Acc:MGI:1922818]
ENSMUSG00000055866	1.29103	0.00995213	Per2	period circadian clock 2 [Source:MGI Symbol;Acc:MGI:1195265]
